# Projections and fractional dynamics of COVID-19 with optimal control analysis

Khondoker Nazmoon Nabi<sup>a,\*</sup>, Pushpendra Kumar<sup>b</sup>, Vedat Suat Erturk<sup>c</sup>

<sup>a</sup>Department of Mathematics, Bangladesh University of Engineering and Technology (BUET), Dhaka, Bangladesh

<sup>b</sup>Department of Mathematics and Statistics, School of Basic and Applied Sciences, Central University of Punjab, Bathinda, Punjab-151001, India

<sup>c</sup>Department of Mathematics, Ondokuz Mayıs University, Atakum-55200, Samsun, Turkey

---

## Abstract

When the entire world is eagerly waiting for a safe, effective and widely available COVID-19 vaccine, unprecedented spikes of new cases are evident in numerous countries. To gain a deeper understanding about the future dynamics of COVID-19, a compartmental mathematical model has been proposed in this paper incorporating all possible non-pharmaceutical intervention policies. Model parameters have been calibrated using sophisticated trust-region-reflective algorithm and short-term projection results have been illustrated for Argentina, Bangladesh, Brazil, Colombia and India. Control reproduction numbers ( $\mathcal{R}_c$ ) have been calculated in order to get insights about the current epidemic scenario in the above-mentioned countries. Forecasting results depict that the aforesaid countries are having downward trends in daily COVID-19 cases. However, it is highly recommended to use efficacious face coverings and maintain strict physical distancing, as the pandemic is not over in any country. Global sensitivity analysis enlightens the fact that efficacy of face coverings is the most significant parameter, which could significantly control the transmission dynamics of the novel coronavirus compared to other non-pharmaceutical measures. In addition, reduction in effective contact rate with isolated patients is also essential in bringing down the epidemic threshold ( $\mathcal{R}_c$ ) below unity. All necessary graphical simulations have been performed with the help of Caputo-Fabrizio fractional derivatives. In addition, optimal control problem for fractional system has been designed and the existence of unique solution has also been showed by using Picard-Lindelof technique. Finally, the unconditionally stability of the given fractional numerical technique has been proved.

*Keywords:* COVID-19, mathematical model, calibration, optimal control, Caputo-Fabrizio fractional derivative

*2010 MSC:* 26A33, 37N25, 92C60, 92D30

---

\*Corresponding author: khnabi@math.buet.ac.bd (Khondoker Nazmoon Nabi)

## 1 1. Introduction

2 To date, as there is no world-wide accepted vaccine that can provide full immunity to the human body  
3 against COVID-19, non-pharmaceutical intervention strategies are the realistic and effective solutions to  
4 control second wave of the pandemic. However, around 40 different coronavirus vaccines are experiencing  
5 critical clinical trials and nine already in the final stage of testing on thousands of people. Importantly, a  
6 leading vaccine candidate developed by the University of Oxford is already in an advanced stage of testing and  
7 it has been found in trials that it can trigger an immune response [1]. Generally, an effective vaccine would  
8 take years, if not decades, to develop. As research in this field is happening at a breakneck speed, scientists  
9 believe that an effective vaccine is likely to become widely available by mid-2021. Lack of transparency  
10 could be a vital issue in upcoming days and a false sense of security could evolve among general people if  
11 the vaccine doesn't work effectively.

12 Mathematical models can always provide considerable insights of the transmission dynamics and complex-  
13 ities of any infectious diseases, which eventually help government officials design overall epidemic planning.  
14 Importantly, mathematical analysis always plays a notable role in making vital public health decisions,  
15 resource allocation and implementation of social distancing measures and other non-pharmaceutical inter-  
16 ventions. From the beginning of the COVID-19 outbreak, mathematicians and researchers are working  
17 relentlessly and have already done tremendous contributions in limiting the spread of the coronavirus in  
18 different parts of the world [2, 3, 4, 5, 6]. In an early contribution, Ferguson *et al.* [2] showed the impact of  
19 different non-pharmaceutical intervention strategies on COVID-19 mortality by developing an agent-based  
20 model. In another study, Ngonghala *et al.* showed that effective and comprehensive usage of face coverings  
21 can significantly limit the spread of the virus and reduce the COVID-induced mortality in different states of  
22 the USA in general in the absence of community lockdown measures and stringent social distancing practice.  
23 On the other hand, Nabi [5] projected the future dynamics of COVID-19 for various COVID-19 hotspots by  
24 proposing a compartmental mathematical model and concluded that early relaxation of lockdown measures  
25 and social distancing could bring a second wave in no time. As a matter of reality, inhabitants in several  
26 countries compelled to violate containment measures due to prolonged lockdown measures and severe eco-  
27 nomic recession [4]. Netherlands having one of the best health care systems in the world, is grappling with  
28 continuous spikes in daily cases due to aversion to masks.

29 In this study, in the absence of a safe, effective and world-wide approved vaccine, a new compartmental  
30 mathematical COVID-19 model has been designed incorporating all possible non-pharmaceutical intervention  
31 strategies such as wearing face coverings, social distancing, home or self-quarantine and self or institutional  
32 isolation. In addition, the impacts of different interventions scenarios have been analysed rigorously. The  
33 aim of this work is to project the future dynamics of COVID-19 outbreak in five countries namely Argentina,  
34 Bangladesh, Brazil, Colombia and India which are worst-hit countries in the world. Estimation of parameters

35 has been performed by using real-time data, followed by a projection of the evolution of the disease. Global  
36 sensitivity analysis is applied to determine the influential mechanisms in the model that drive the transmission  
37 dynamics of the disease. For fractional simulations, we used the well known non-integer order derivative called  
38 Caputo-Fabrizio (CF) fractional derivative. Since last few decades, there are so many epidemic models have  
39 been solved by non-integer order derivatives. Recently some applications of non-integer order derivatives in  
40 mathematical epidemiology can be seen from [7, 8, 9, 10, 11]. There are so many research papers have been  
41 come to study the outbreaks of coronavirus, in which some are [12, 13, 14, 15, 16, 17, 18, 19, 20, 21]. We  
42 performed the optimal control problem in CF derivative sense and provided the existence of unique solution  
43 by well-known technique named as Picard-Lindelof technique. We also proved the unconditionally stability  
44 of the given fractional numerical technique. We used the numerical data of all five given countries and  
45 perform the all necessary graphical simulations.

46 The entire chapter is organized as follows. Materials and methods are presented in Section 2. Section 3 is  
47 solely devoted to asymptotic stability of the proposed model. In section 4, estimation of model parameters  
48 and projection results have been discussed using daily COVID-19 data of Argentina, Bangladesh, Brazil,  
49 Colombia and India. In section 5, to quantify the impact of different model mechanisms, LHS-PRCC  
50 global sensitivity scheme has been performed. In section 6, numerical and graphical simulations have been  
51 illustrated using Caputo-Fabrizio fractional derivatives. Later, optimal control problem has been designed  
52 in fractional sense in section 7. The chapter ends with some insightful findings and strategies, which could  
53 significantly control the transmission dynamics of COVID-19.

## 54 **2. Materials and methods**

### 55 *2.1. Model formulation*

A compartmental mathematical has been designed to describe the transmission dynamics of the COVID-19 incorporating all possible real-life interactions. Considering different infection status, the entire human population (denoted by  $N(t)$  at time  $t$ ) has been stratified into nine mutually-exclusive compartments of susceptible individuals ( $S(t)$ ), early-exposed individuals ( $E_1(t)$ ), pre-symptomatic individuals ( $E_2(t)$ ), symptomatically-infectious ( $I(t)$ ), asymptotically-infectious or infectious individuals with mild-symptoms ( $A(t)$ ), quarantined infectious ( $Q(t)$ ), hospitalised or isolated individuals ( $L(t)$ ), recovered individuals ( $R(t)$ ), disease-induced death cases ( $D(t)$ ). Hence,

$$N(t) = S(t) + E_1(t) + E_2(t) + I(t) + A(t) + Q(t) + L(t) + R(t) + D(t)$$

56 The following assumptions have been considered to formulate the above-mentioned model.

- 57 • Vital dynamic (birth and natural deaths) has been ignored as the main objective of this study is to  
58 observe the short-term dynamics of COVID-19 pandemic.

It is made available under a [CC-BY-NC-ND 4.0 International license](https://creativecommons.org/licenses/by-nc-nd/4.0/) .

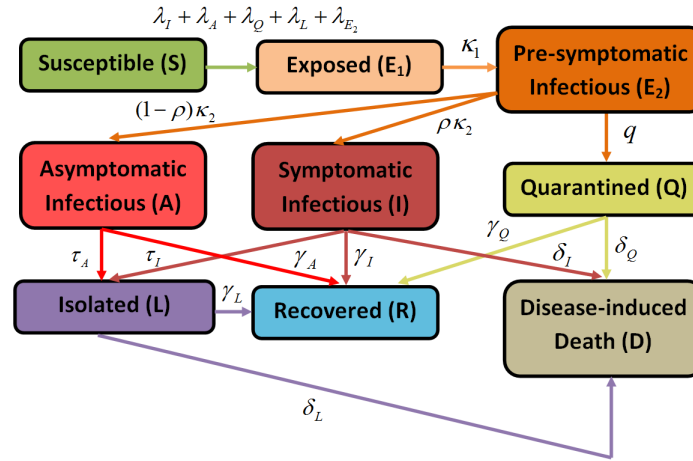

Figure 1: Flow diagram of the COVID-19 transmission dynamics.

- 50 • Recovered individuals are immune to the disease which means that they cannot get reinfected. However,  
 60 in a recent study of Tillet *et al.* [22], genomic evidence for reinfection with SARS-CoV-2 has been  
 61 found. Nevertheless, it is important to note this singular finding does not provide generalisability of  
 62 this phenomenon and hence it is not considered in our study.

The flow diagram of the proposed model is illustrated in Figure 1, where susceptible individuals can become infected by an effective contact with individuals in the pre-symptomatic ( $E_2(t)$ ), symptomatically-infectious ( $I(t)$ ), asymptotically-infectious ( $A(t)$ ), quarantined-infectious ( $Q(t)$ ) and isolated-infectious ( $L(t)$ ). Effective contact rates are  $\lambda_{E_2}$ ,  $\lambda_I$ ,  $\lambda_A$ ,  $\lambda_Q$ , and  $\lambda_L$  respectively and the expressions are defined in (2). Importantly, the compartment  $E_1(t)$  consists of early-infected individuals who are still not infectious, whereas the individuals in pre-symptomatic cohort  $E_2(t)$  have the capability of transmitting coronavirus before the end of the disease incubation period. A proportion of individuals in newly-exposed compartment ( $E_1(t)$ ) progress to pre-symptomatic class ( $E_2(t)$ ) at a rate  $\kappa_1$ . After the completion of disease mean incubation period, at a rate  $\rho\kappa_2$ , a fraction of individuals who have clear clinical symptoms of COVID-19 progress to  $I(t)$  compartment. Individuals in  $E_2(t)$  class who do not have any clear symptoms progress to  $A(t)$  class at a rate  $(1 - \rho)\kappa_2$ . Pre-symptomatic individuals are assumed to be self-quarantined at a rate  $q$ . With the help of diagnostic or surveillance testing approaches, symptomatically-infectious individuals and asymptotically-infectious individuals are brought under institutional or home isolation at rates  $\tau_A$  and  $\tau_I$  respectively. Moreover, the parameter  $\gamma_I(\gamma_A)(\gamma_Q)(\gamma_L)$  represents the recovery rate for individuals in the  $I(A)(Q)(L)$  class. Finally, the disease-induced mortality rate for individuals in the  $I(Q)(L)$  compartment is defined by the parameter  $\delta_I(\delta_Q)(\delta_L)$ . Considering all the above-mentioned interactions, the transmission dynamics of COVID-19 can

be described by the following system of nonlinear ordinary differential equations.

$$\left\{ \begin{array}{l} \frac{dS}{dt} = -(\lambda_I + \lambda_A + \lambda_Q + \lambda_L + \lambda_{E_2}) S, \\ \frac{dE_1}{dt} = (\lambda_I + \lambda_A + \lambda_Q + \lambda_L + \lambda_{E_2}) S - \kappa_1 E_1, \\ \frac{dE_2}{dt} = \kappa_1 E_1 - (\kappa_2 + q) E_2, \\ \frac{dI}{dt} = \rho \kappa_2 E_2 - (\tau_I + \gamma_I + \delta_I) I, \\ \frac{dA}{dt} = (1 - \rho) \kappa_2 E_2 - (\tau_A + \gamma_A) A, \\ \frac{dQ}{dt} = q E_2 - (\gamma_Q + \delta_Q) Q, \\ \frac{dL}{dt} = \tau_I I + \tau_A A - (\delta_L + \gamma_L) L, \\ \frac{dR}{dt} = \gamma_I I + \gamma_A A + \gamma_Q Q + \gamma_L L, \\ \frac{dD}{dt} = \delta_I I + \delta_L L + \delta_Q Q. \end{array} \right. \quad (1)$$

where the forces of infection are defined below

$$\left\{ \begin{array}{l} \lambda_{E_2} = \beta_{E_2} (1 - m\zeta) \frac{E_2}{N}, \\ \lambda_I = \beta_I (1 - m\zeta) \frac{I}{N}, \\ \lambda_A = \beta_A (1 - m\zeta) \frac{A}{N}, \\ \lambda_Q = \beta_Q (1 - m\zeta) \frac{Q}{N}, \\ \lambda_L = \beta_L (1 - m\zeta) \frac{L}{N}, \end{array} \right. \quad (2)$$

63 The parameters are described in Table 1.

64 We set  $x = (S, E_1, E_2, I, A, Q, L, R, D)'$  the vector of state variable, Let  $f : \mathbb{R}^9 \rightarrow \mathbb{R}^9$  the the right hand side  
65 of system (1), which is a continuously differentiable function on  $\mathbb{R}^9$ . According to [23, Theorem III.10.VI], for

| Parameter                                                             | Description                                                                                                           |
|-----------------------------------------------------------------------|-----------------------------------------------------------------------------------------------------------------------|
| $\beta_I$ ( $\beta_A$ ) ( $\beta_Q$ ) ( $\beta_L$ ) ( $\beta_{E_2}$ ) | Effective contact rate (a measure of physical or social distancing)                                                   |
| $m$                                                                   | Proportion of individuals who use face coverings or surgical masks                                                    |
| $\zeta$                                                               | Efficacy of face coverings at reducing outward transmission by infected individuals as well as preventing acquisition |
| $\kappa_1$                                                            | Rate of progression from early-exposed class ( $E_1(t)$ ) to pre-symptomatic class ( $E_2(t)$ )                       |
| $\rho\kappa_2$                                                        | Rate of progression from pre-symptomatic class ( $E_2(t)$ ) to symptomatically-infectious class ( $I(t)$ )            |
| $(1 - \rho)\kappa_2$                                                  | Rate of progression from pre-symptomatic class ( $E_2(t)$ ) to asymptotically-infectious class ( $A(t)$ )             |
| $q$                                                                   | Confinement efficacy                                                                                                  |
| $\tau_I$                                                              | Rate of self or institutional isolation for symptomatically-infectious patients                                       |
| $\tau_A$                                                              | Rate of isolation for asymptotically-infectious patients                                                              |
| $\gamma_I$                                                            | Recovery rate for symptomatically-infectious patients                                                                 |
| $\gamma_A$                                                            | Recovery rate for asymptotically-infectious individuals                                                               |
| $\gamma_Q$                                                            | Recovery rate for quarantined-infectious individuals                                                                  |
| $\gamma_L$                                                            | Recovery rate for isolated or hospitalised individuals                                                                |
| $\delta_I$                                                            | Disease-induced death rate for symptomatically-infectious individuals                                                 |
| $\delta_L$                                                            | Disease-induced death rate for isolated individuals                                                                   |
| $\delta_Q$                                                            | Disease-induced death rate for quarantined-infectious                                                                 |

Table 1: Model parameters and meaning

66 any initial condition in  $\Omega$ , a unique solution of (1) exists, at least locally, and remains in  $\Omega$  for its maximal  
 67 interval of existence [23, Theorem III.10.XVI]. Hence, model (1) is biologically well-defined.

## 68 2.2. Data sources

69 From the beginning of the COVID-19 outbreak, Center of Disease Control and Prevention (CDC) is  
 70 providing authoritative and genuine data of daily confirmed COVID-19 cases. Daily confirmed data of five  
 71 different countries named Argentina, Bangladesh, Brazil, Colombia and India have been compiled using  
 72 that data repository. Johns Hopkins University Center for Systems Science and Engineering (JHU CSSE)  
 73 is carefully maintaining the data repository supported by ESRI Living Atlas Team and the Johns Hopkins  
 74 University Applied Physics Lab (JHU APL). The repository is really simple to use and publicly available  
 75 [24].

### 76 3. Mathematical analysis

#### 77 3.1. Asymptotic stability of disease-free equilibria

The disease-free equilibrium point denoted by  $x_0$  can be defined as follows:

$$x_0 = (S_0, 0, 0, 0, 0, 0, 0, 0, 0)' = (N_0, 0, 0, 0, 0, 0, 0, 0, 0)'$$

Using notations in [25], matrices  $F$  and  $V$  for the new infection terms and the remaining transfer terms are, respectively, given by

$$F = \begin{pmatrix} 0 & \beta_{E_2}(1-m\zeta)\frac{S_0}{N_0} & \beta_I(1-m\zeta)\frac{S_0}{N_0} & \beta_A(1-m\zeta)\frac{S_0}{N_0} & \beta_Q(1-m\zeta)\frac{S_0}{N_0} & \beta_L(1-m\zeta)\frac{S_0}{N_0} \\ 0 & 0 & 0 & 0 & 0 & 0 \\ 0 & 0 & 0 & 0 & 0 & 0 \\ 0 & 0 & 0 & 0 & 0 & 0 \\ 0 & 0 & 0 & 0 & 0 & 0 \\ 0 & 0 & 0 & 0 & 0 & 0 \end{pmatrix},$$

$$V = \begin{pmatrix} \kappa_1 & 0 & 0 & 0 & 0 & 0 \\ -\kappa_1 & \kappa_2 + q & 0 & 0 & 0 & 0 \\ 0 & -\rho\kappa_2 & \tau_I + \gamma_I + \delta_I & 0 & 0 & 0 \\ 0 & -(1-\rho)\kappa_2 & 0 & \tau_A + \gamma_A & 0 & 0 \\ 0 & -q & 0 & 0 & \gamma_Q + \delta_Q & 0 \\ 0 & 0 & -\tau_I & -\tau_A & 0 & \gamma_L + \delta_L \end{pmatrix}.$$

(3)

Then, the control reproduction ratio is defined, following [26, 25], as the spectral radius of the next generation matrix,  $FV^{-1}$ :

$$\mathcal{R}_c = \rho(FV^{-1}) = \mathcal{R}_{E_2} + \mathcal{R}_I + \mathcal{R}_A + \mathcal{R}_Q + \mathcal{R}_L$$

(4)

78 where,

$$\mathcal{R}_{E_2} = \frac{\beta_{E_2}(1-m\zeta)}{\kappa_2 + q},$$

$$\mathcal{R}_I = \frac{\rho\kappa_2\beta_I(1-m\zeta)}{(\kappa_2 + q)(\gamma_I + \tau_I + \delta_I)},$$

$$\mathcal{R}_A = \frac{\kappa_2(1-\rho)\beta_A(1-m\zeta)}{(\kappa_2 + q)(\gamma_A + \tau_A)},$$

$$\mathcal{R}_Q = \frac{q\beta_Q(1-m\zeta)}{(\kappa_2 + q)(\gamma_Q + \delta_Q)},$$

$$\mathcal{R}_L = \frac{\kappa_2\beta_L(1-m\zeta) [\tau_A(\gamma_I + \delta_I)(1-\rho) + \tau_I(\rho\gamma_A + \tau_A)]}{(\kappa_2 + q)(\gamma_L + \delta_L)(\gamma_A + \tau_A)(\gamma_I + \tau_I + \delta_I)},$$

79 where  $\rho(\cdot)$  represents the spectral radius operator.

80 The formula for control reproduction number has been formulated. Indeed, the insightful epidemic  
81 threshold,  $\mathcal{R}_c$  calculates the average number of new secondary COVID-19 cases generated by a COVID-19  
82 positive individual in a population a portion susceptible people are using effective face coverings. Different  
83 non-pharmaceutical measures are acting as control measures which lead to bring down  $\mathcal{R}_c$  under unity [25].  
84 Hence, we claim the following result followed by a direct consequence of the next generation operator method  
85 [25, Theorem 2]. where  $\rho(\cdot)$  represents the spectral radius operator. The insightful epidemic threshold,  $\mathcal{R}_0$   
86 calculates the average number of new secondary COVID-19 infections generated by an COVID-19 positive  
87 patient in a completely susceptible population. The control of COVID-19 pandemic passes by the application  
88 of some control measures which contribute to decrease until  $\mathcal{R}_0$  less than one [25]. Hence we claim the  
89 following result.

90 **Theorem 1.** The COVID-19 transmission dynamics is influenced by the basic reproduction number  $\mathcal{R}_0$  as  
91 follows:

- 92 1. If  $\mathcal{R}_0 < 1$ , then a sufficiently small flow of infected individuals will not generate an outbreak of the  
93 COVID-19, i.e the disease-equilibrium  $\mathcal{E}_0$  is locally asymptotically stable on  $\omega$ .
- 94 2. If  $\mathcal{R}_0 > 1$ , then a sufficiently small flow of infected individuals will generate an outbreak of the COVID-  
95 19, and the disease-equilibrium  $\mathcal{E}_0$  is unstable.

96 **Lemma 1.** If  $\mathcal{R}_c < 1$ , the disease-free equilibrium  $x_0$  is locally asymptotically stable and unstable if  $\mathcal{R}_c > 1$ .

97 **Remark 2.** Lemma 1 implies that if  $\mathcal{R}_c < 1$ , then a sufficiently small flow of infected individuals will  
98 not generate an outbreak of COVID-19, whereas for  $\mathcal{R}_c > 1$ , epidemic curve reaches a peak by growing  
99 exponentially and then decreases to zero as  $t \rightarrow \infty$ .

100 The better control of the COVID-19 can be established by the fact that the DFE  $x_0$  is globally asymp-  
101 totically stable (GAS). In this context, we claim the following result.

102 **Theorem 3.** if  $\mathcal{R}_c < 1$ , then the manifold,  $\mathcal{W}$ , of disease-free equilibrium points of the model (1) is GAS in  
103  $\mathcal{D}$ .

In the absence of use of face coverings, i.e.  $m = 0$ ,  $\mathcal{R}_c$  converges to the basic reproduction number,  $\mathcal{R}_0$ . Now, we will study the global stability of the disease-free equilibrium whenever the basic reproduction number is less than one ( $\mathcal{R}_c < 1$ ). For this, we use the following Lyapunov function

$$\mathcal{L} = a_1 E_1 + a_2 E_2 + a_3 I + a_4 A + a_5 Q + a_6 L. \quad (5)$$



By deriving this function along the trajectories of the system (1), we obtain

$$\begin{aligned}
 \dot{\mathcal{L}} &= a_1 \dot{E}_1 + a_2 \dot{E}_2 + a_3 \dot{I} + a_4 \dot{A} + a_5 \dot{Q} + a_6 \dot{L} \\
 &= a_1 [(\lambda_I + \lambda_A + \lambda_Q + \lambda_L + \lambda_{E_2}) S - \kappa_1 E_1] \\
 &\quad + a_2 [\kappa_1 E_1 - (\kappa_2 + q) E_2] + a_3 [\rho \kappa_2 E_2 - (\tau_I + \gamma_I + \delta_I) I] \\
 &\quad + a_4 [(1 - \rho) \kappa_2 E_2 - (\tau_A + \gamma_A) A] + a_5 [q E_2 - (\gamma_Q + \delta_Q) Q] \\
 &\quad + a_6 [\tau_I I + \tau_A A - (\delta_L + \gamma_L) L]
 \end{aligned} \tag{6}$$

Since  $\frac{S}{N} \leq 1$ , we obtain

$$\begin{aligned}
 \dot{\mathcal{L}} &\leq a_1 [\beta_I(1 - m\zeta)I + \beta_A(1 - m\zeta)A + \beta_Q(1 - m\zeta)Q + \beta_L(1 - m\zeta)L + \beta_{E_2}(1 - m\zeta)E_2 - \kappa_1 E_1] \\
 &\quad + a_2 [\kappa_1 E_1 - (\kappa_2 + q) E_2] + a_3 [\rho \kappa_2 E_2 - (\tau_I + \gamma_I + \delta_I) I] \\
 &\quad + a_4 [(1 - \rho) \kappa_2 E_2 - (\tau_A + \gamma_A) A] + a_5 [q E_2 - (\gamma_Q + \delta_Q) Q] \\
 &\quad + a_6 [\tau_I I + \tau_A A - (\delta_L + \gamma_L) L] \\
 &= (-a_1 \kappa_1 + a_2 \kappa_1) E_1 \\
 &\quad + [a_1 \beta_{E_2}(1 - m\zeta) - a_2 (\kappa_2 + q) + a_3 \rho \kappa_2 + a_4 (1 - \rho) \kappa_2 + a_5 q] E_2 \\
 &\quad + [a_1 \beta_I(1 - m\zeta) - a_3 (\tau_I + \gamma_I + \delta_I) + a_6 \tau_I] I \\
 &\quad + [a_1 \beta_A(1 - m\zeta) - a_4 (\tau_A + \gamma_A) + a_6 \tau_A] A \\
 &\quad + [a_1 \beta_Q(1 - m\zeta) - a_5 (\gamma_Q + \delta_Q)] Q + [a_1 \beta_L(1 - m\zeta) - a_6 (\delta_L + \gamma_L)] L
 \end{aligned} \tag{7}$$

We choose  $a_i$ ,  $i = 1, 2, \dots, 6$ , such that coefficients of  $E_1$ ,  $I$ ,  $A$ ,  $Q$ , and  $L$  become zero. That is

$$\begin{cases}
 -a_1 \kappa_1 + a_2 \kappa_1 & = 0 \\
 a_1 \beta_I(1 - m\zeta) - a_3 (\tau_I + \gamma_I + \delta_I) + a_6 \tau_I & = 0 \\
 a_1 \beta_A(1 - m\zeta) - a_4 (\tau_A + \gamma_A) + a_6 \tau_A & = 0 \\
 a_1 \beta_Q(1 - m\zeta) - a_5 (\gamma_Q + \delta_Q) & = 0 \\
 a_1 \beta_L(1 - m\zeta) - a_6 (\delta_L + \gamma_L) & = 0
 \end{cases} \tag{8}$$

which the non-zero solution is given by

$$\begin{cases}
 a_6 & = \frac{a_1 \beta_L(1 - m\zeta)}{\delta_L + \gamma_L} \\
 a_5 & = \frac{a_1 \beta_Q(1 - m\zeta)}{\delta_Q + \gamma_Q} \\
 a_4 & = \frac{a_1 \beta_A(1 - m\zeta) + a_6 \tau_A}{\tau_A + \gamma_A} \\
 a_3 & = \frac{a_1 \beta_I(1 - m\zeta) + a_6 \tau_I}{\tau_I + \delta_I + \gamma_I} \\
 a_2 & = a_1
 \end{cases} \tag{9}$$

Plugging (9) into (7) gives

$$\begin{aligned} \dot{\mathcal{L}} \leq a_1(\kappa_2 + q) & \left[ \frac{\beta_{E_2}(1 - m\zeta)}{\kappa_2 + q} + \frac{\rho\kappa_2\beta_I(1 - m\zeta)}{(\kappa_2 + q)(\gamma_I + \tau_I + \delta_I)} + \frac{\kappa_2(1 - \rho)\beta_A(1 - m\zeta)}{(\kappa_2 + q)(\gamma_A + \tau_A)} \right. \\ & \left. + \frac{q\beta_Q(1 - m\zeta)}{(\kappa_2 + q)(\gamma_Q + \delta_Q)} + \frac{\kappa_2\beta_L(1 - m\zeta) [\tau_A(\gamma_I + \delta_I)(1 - \rho) + \tau_I(\rho\gamma_A + \tau_A)]}{(\kappa_2 + q)(\gamma_L + \delta_L)(\gamma_A + \tau_A)(\gamma_I + \tau_I + \delta_I)} - 1 \right] E_2. \end{aligned} \quad (10)$$

Setting  $a_1 = \frac{1}{\kappa_2 + q}$ , we finally obtain

$$\dot{\mathcal{L}} \leq (\mathcal{R}_{E_2} + \mathcal{R}_I + \mathcal{R}_A + \mathcal{R}_Q + \mathcal{R}_L - 1) E_2 = (\mathcal{R}_c - 1) E_2. \quad (11)$$

From (11), it follows that  $\dot{\mathcal{L}} < 0$  if  $\mathcal{R}_c < 1$ , and  $\dot{\mathcal{L}} = 0$  if and only if  $E_1 = E_2 = I = A = Q = L = 0$ . Therefore,  $\mathcal{L}$  is a Lyapunov function for system (1). Moreover, the maximal invariant set contained in  $\{(S(t), E_1(t), E_2(t), I(t), A(t), Q(t), L(t), R(t), D(t)) \in \Omega : \dot{\mathcal{L}} = 0\}$  is the continuum of the disease-free equilibrium ( $\mathcal{E}_0$ ). Thus, from Lyapunov theory, we deduce that the disease-free equilibrium  $\mathcal{E}_0$  is GAS if  $\mathcal{R}_c < 1$ . Hence, it follows, by the LaSalle's Invariance Principal, that the continuum of disease-free equilibria of the model (1) is a stable global attractor in  $\Omega$  whenever  $\mathcal{R}_c \leq 1$ . The previous analysis can be summarize as follows:

**Theorem 4.** If  $\mathcal{R}_c \leq 1$ , then the disease-free equilibrium  $\mathcal{E}_0$  is globally asymptotically stable on  $\Omega$ .

#### 4. Model calibration and forecasting

The model (1) calibration has been performed using a newly developed optimization algorithm based on trust-region-reflective (TRR) algorithm, which can be regarded as an evolution of Levenberg-Marquardt algorithm [5]. This robust optimization procedure can be used effectively for solving nonlinear least-squares problems. This algorithm has been implemented using the **lsqcurvefit** function, which is available in the Optimization Toolbox in MATLAB. Necessary model parameters have been estimated using this optimization technique. Daily infected cases data have been collected from a trusted data repository, which is available online. A 7-day moving average of the daily reported cases has been used for our model calibration due to moderate volatile nature of real data. It has been observed that the number of daily testing in Argentina, Bangladesh, Brazil, Colombia and India have been really inconsistent. With an aim to capture the real outbreak scenario, the 7-day moving average has been used in this regard.

##### 4.1. Argentina

On March 3, 2020, Argentina registered its first COVID-19 case. As a consequence, government officials immediately deploy strict lockdown, quarantine and isolation measures to curb the spread of the novel

It is made available under a [CC-BY-NC-ND 4.0 International license](https://creativecommons.org/licenses/by-nc-nd/4.0/) .

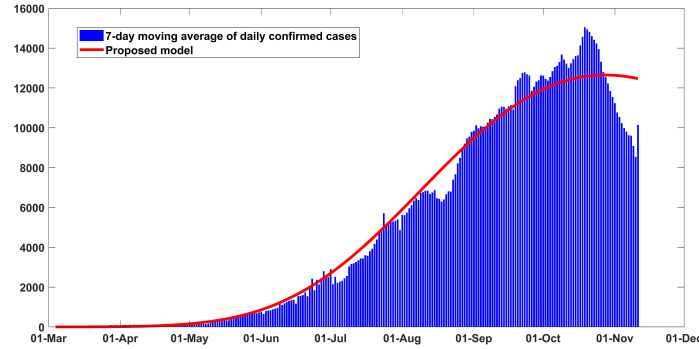

Figure 2: Fitting performance of the model for daily infected cases in Argentina from March 04 to November 11, 2020.

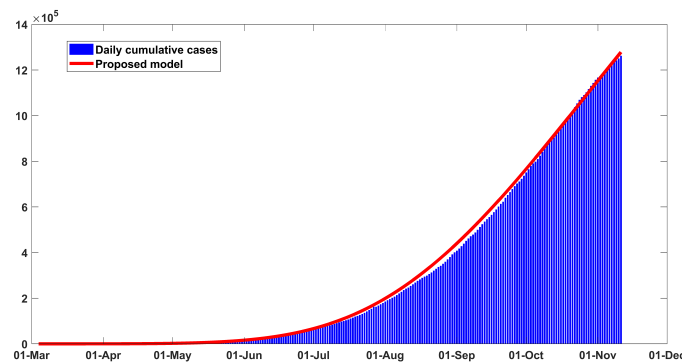

Figure 3: Fitting performance of the model for cumulative infected cases in Argentina from March 04 to November 11, 2020.

126 coronavirus in the community. Due to unbearable economic crisis, inhabitants of the country have already  
127 started violating staying at home and quarantine orders. The country could face a second wave of infection  
128 in near future in the absence of non-pharmaceutical intervention measures. The robustness of our model  
129 fitting performance has been illustrated in Figs. 2 and 3 as of November 11, 2020. Moreover, projection  
130 results from mid November to early April for daily and cumulative cases in Argentina have been depicted  
131 in Figs. 4 and 5. According to our projection results, the daily could reach upto 2450K cases by the end  
132 of March 2021, if the current trend holds. Model parameters presented in the Table 2 have been calibrated  
133 using observed real data from March 4 to November 11, 2020.

134 As we can see the results from the proposed model responses complement the real data very well. The  
135 control reproduction number ( $\mathcal{R}_c$ ) is estimated to be  $\sim 1.37$  (95%  $CI$  : 1.03 – 1.59) as of November 11 and  
136 prior established findings 1 – 5 for COVID-19 really match well with the estimation [30, 5]. The tally of  
137 cumulative infected cases is projected to reach 2450K and country's death toll could mount to 52.6K by the  
138 end of March 2021. Table 2 illustrates model calibration results and baseline parameter values.

It is made available under a [CC-BY-NC-ND 4.0 International license](https://creativecommons.org/licenses/by-nc-nd/4.0/) .

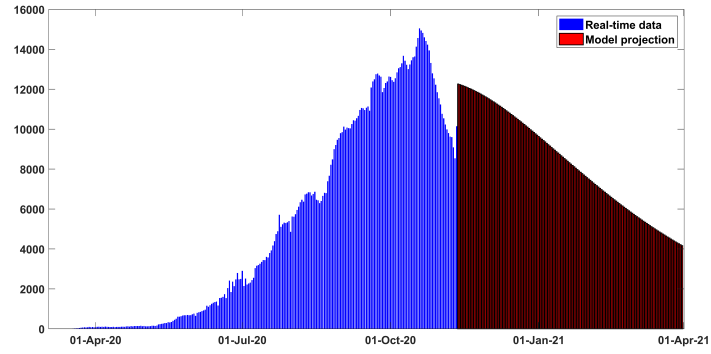

Figure 4: Projection results for daily new confirmed cases for Argentina from early March to late March 2021.

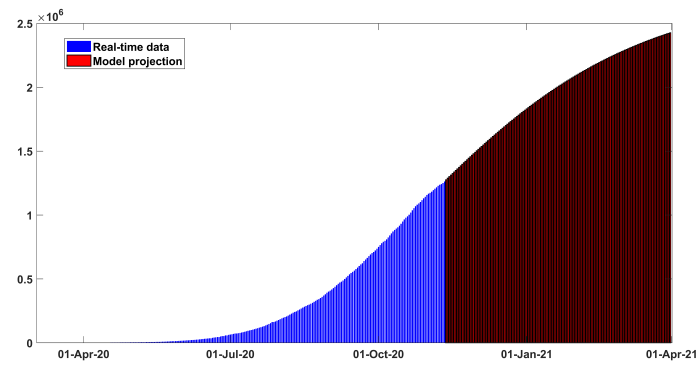

Figure 5: Projection results for cumulative cases for Argentina early March to late March 2021.

| Parameter     | Range (Unit)                           | Baseline value | TRR output    | Reference |
|---------------|----------------------------------------|----------------|---------------|-----------|
| $\beta_I$     | 0.1–1.5 $day^{-1}$                     | 0.55           | 0.3           | [27, 5]   |
| $\beta_A$     | 0.1–0.9 $day^{-1}$                     | 0.3            | 0.15          | [27, 5]   |
| $\beta_Q$     | 0.1–0.9 $day^{-1}$                     | 0.5            | 0.3           | [27, 5]   |
| $\beta_L$     | 0.1–0.9 $day^{-1}$                     | 0.3            | 0.35          | [5, 6]    |
| $\beta_{E_2}$ | 0.05–0.3 $day^{-1}$                    | 0.3            | 0.1           | [6]       |
| $m$           | 0.01–0.3 (dimensionless)               | 0.1            | 0.15          | [6]       |
| $\zeta$       | 0.5 (dimensionless)                    | 0.5            | 0.5           | [6]       |
| $\kappa_1$    | $\frac{1}{4} day^{-1}$                 | $\frac{1}{4}$  | $\frac{1}{4}$ | [3, 6]    |
| $\kappa_2$    | 1 $day^{-1}$                           | 1              | 1             | [3]       |
| $q$           | 0.1–0.6 $day^{-1}$                     | 0.3            | 0.25          | Estimated |
| $\rho$        | 0.6–0.7 (dimensionless)                | 0.65           | 0.65          | [6]       |
| $\tau_I$      | $\frac{1}{14} - \frac{1}{5} day^{-1}$  | 1/10           | 1/10          | [5, 6]    |
| $\tau_A$      | $\frac{1}{14} - \frac{1}{5} day^{-1}$  | 1/10           | 1/10          | [5, 6]    |
| $\gamma_I$    | $\frac{1}{14} - \frac{1}{7} day^{-1}$  | 1/7            | 0.143         | [28, 29]  |
| $\gamma_A$    | $\frac{1}{10} - \frac{1}{7} day^{-1}$  | 1/7            | 0.143         | [28, 29]  |
| $\gamma_Q$    | $\frac{1}{21} - \frac{1}{10} day^{-1}$ | 1/14           | 0.071         | [28, 29]  |
| $\gamma_L$    | $\frac{1}{21} - \frac{1}{10} day^{-1}$ | 1/14           | 0.071         | [28, 29]  |
| $\delta_I$    | 0.0001–0.01 $day^{-1}$                 | 0.001          | 0.00033       | [2, 5]    |
| $\delta_L$    | 0.0001–0.01 $day^{-1}$                 | 0.001          | 0.001         | [2, 5]    |
| $\delta_Q$    | 0.0001–0.01 $day^{-1}$                 | 0.001          | 0.00033       | [2, 5]    |

Table 2: Calibrated parameters of the proposed model (1) using trust-region-reflective algorithm and daily COVID-19 cases data of Argentina.

#### 139 4.2. Bangladesh

140 Due to prolonged lockdown measures and severe economic recession, inhabitants of Bangladesh have  
 141 started violating safety measures like wearing face coverings and maintaining physical distancing. Figs. 6  
 142 and 7 illustrate the model fitting performance with observed data from early March to mid November for

It is made available under a [CC-BY-NC-ND 4.0 International license](https://creativecommons.org/licenses/by-nc-nd/4.0/) .

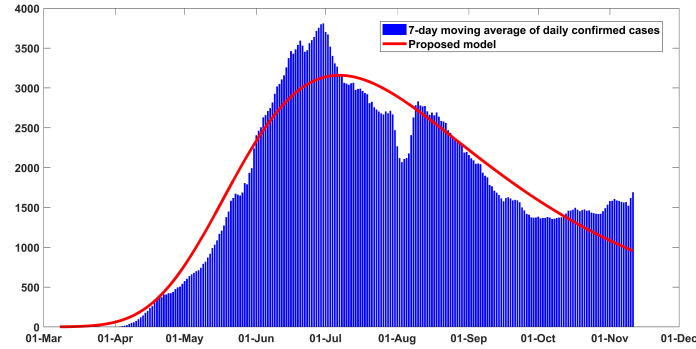

Figure 6: Fitting performance of the model for daily infected cases in Bangladesh from March 08 to November 11, 2020.

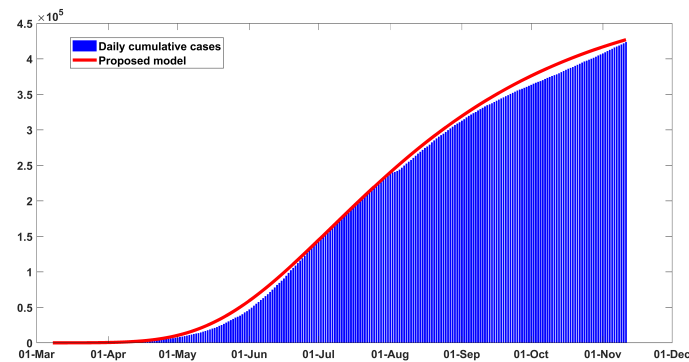

Figure 7: Fitting performance of the model for cumulative infected cases in Bangladesh from March 08 to November 11, 2020.

143 Bangladesh. The estimated error is found to be hovering around 10% for daily new cases. The actual  
144 outbreak scenario in Bangladesh is still a puzzle to be solved for the health officials due to scant COVID-19  
145 testing program. The control reproduction number ( $\mathcal{R}_c$ ) is estimated to be  $\sim 1.17$  (95%  $CI$  : 0.95 – 1.39) as  
146 of November 11 and prior established findings for this metric go well with the estimation [30, 5]. The tally of  
147 cumulative infected cases is projected to reach 436K around March 31, 2021 and the estimated total death  
148 cases could reach 11,400 by the end of March, 2021. Table 3 illustrates the key features used to calibrate  
149 this scenario, which have been justified in prior clinical studies and relevant literature.

#### 150 4.3. Brazil

151 COVID-19 pandemic emerged in Latin America a bit later than other continents and Brazil is among the  
152 hardest-hit countries in the world. When late-stage clinical trials of Chinese-developed CoronaVac vaccine  
153 are going on in Brazil, the inhabitants of Brazil are witnessing unprecedented spikes in new COVID-19 cases.

It is made available under a [CC-BY-NC-ND 4.0 International license](https://creativecommons.org/licenses/by-nc-nd/4.0/) .

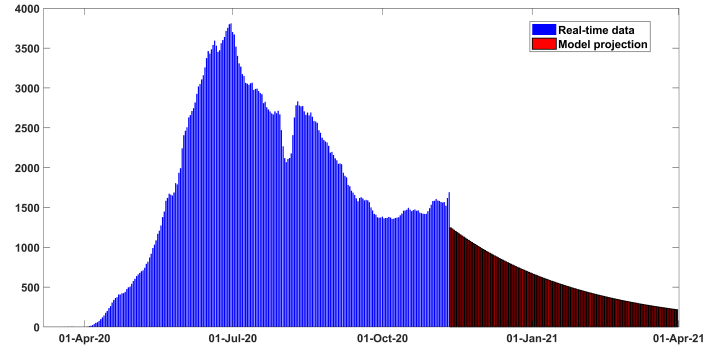

Figure 8: Projection results for daily new confirmed cases for Bangladesh from early March to late March 2021.

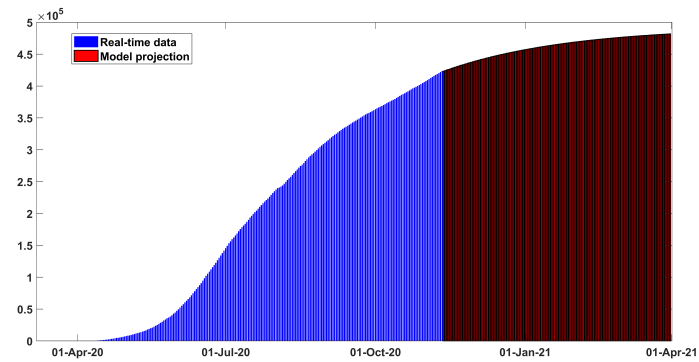

Figure 9: Projection results for cumulative cases for Bangladesh early March to late March 2021.

| Parameter     | Range (Unit)                           | Baseline value | TRR output    | Reference |
|---------------|----------------------------------------|----------------|---------------|-----------|
| $\beta_I$     | 0.1–1.5 $day^{-1}$                     | 0.55           | 0.15          | [27, 5]   |
| $\beta_A$     | 0.1–0.9 $day^{-1}$                     | 0.3            | 0.1           | [27, 5]   |
| $\beta_Q$     | 0.1–0.9 $day^{-1}$                     | 0.5            | 0.1           | [27, 5]   |
| $\beta_L$     | 0.1–0.9 $day^{-1}$                     | 0.3            | 0.12          | [5, 6]    |
| $\beta_{E_2}$ | 0.05–0.3 $day^{-1}$                    | 0.3            | 0.11          | [6]       |
| $m$           | 0.01–0.3 (dimensionless)               | 0.1            | 0.3           | [6]       |
| $\zeta$       | 0.5 (dimensionless)                    | 0.5            | 0.5           | [6]       |
| $\kappa_1$    | $\frac{1}{4} day^{-1}$                 | $\frac{1}{4}$  | $\frac{1}{4}$ | [3, 6]    |
| $\kappa_2$    | 1 $day^{-1}$                           | 1              | 1             | [3]       |
| $q$           | 0.1–0.6 $day^{-1}$                     | 0.3            | 0.47          | Estimated |
| $\rho$        | 0.6–0.7 (dimensionless)                | 0.65           | 0.65          | [6]       |
| $\tau_I$      | $\frac{1}{14} - \frac{1}{5} day^{-1}$  | 1/10           | 1/8           | [5, 6]    |
| $\tau_A$      | $\frac{1}{14} - \frac{1}{5} day^{-1}$  | 1/10           | 1/8           | [5, 6]    |
| $\gamma_I$    | $\frac{1}{14} - \frac{1}{7} day^{-1}$  | 1/7            | 1/12          | [28, 29]  |
| $\gamma_A$    | $\frac{1}{10} - \frac{1}{7} day^{-1}$  | 1/7            | 1/10          | [28, 29]  |
| $\gamma_Q$    | $\frac{1}{21} - \frac{1}{10} day^{-1}$ | 1/21           | 0.071         | [28, 29]  |
| $\gamma_L$    | $\frac{1}{21} - \frac{1}{10} day^{-1}$ | 1/21           | 0.071         | [28, 29]  |
| $\delta_I$    | 0.0001–0.01 $day^{-1}$                 | 0.001          | 0.0004        | [2, 5]    |
| $\delta_L$    | 0.0001–0.01 $day^{-1}$                 | 0.001          | 0.0009        | [2, 5]    |
| $\delta_Q$    | 0.0001–0.01 $day^{-1}$                 | 0.001          | 0.0007        | [2, 5]    |

Table 3: Calibrated parameters of the proposed model (1) using trust-region-reflective algorithm and daily COVID-19 cases data of Bangladesh.

154 As of November 15, 2020, Brazil reported 5,863,093 cases and related 165,811 deaths. The model fitting  
 155 performance for Brazil from late February to mid November are illustrated in Figs. 10 and 11. Historical  
 156 data from late February to November 11, 2020 have been considered to calibrate the model parameters.  
 157 It is clearly visible in the figures that the responses from the proposed model fit the real data very well.



158 The control reproduction number is estimated about  $\sim 2.12$  as of November 11, which is in between the  
 159 observed findings for COVID-19 [30, 5]. Fig. 13 illustrates that the tally of total infected cases could mount  
 160 to 6368.6K by the end of March 2021 if current trend is held, and death toll could surpass 215K within this  
 161 time period. Table 4 depicts the key features used to calibrate this scenario.

| Parameter     | Range (Unit)                           | Baseline value | TRR output    | Reference |
|---------------|----------------------------------------|----------------|---------------|-----------|
| $\beta_I$     | 0.1–1.5 $day^{-1}$                     | 0.55           | 0.15          | [27, 5]   |
| $\beta_A$     | 0.1–0.9 $day^{-1}$                     | 0.3            | 0.1           | [27, 5]   |
| $\beta_Q$     | 0.1–0.9 $day^{-1}$                     | 0.5            | 0.21          | [27, 5]   |
| $\beta_L$     | 0.1–0.9 $day^{-1}$                     | 0.3            | 0.23          | [5, 6]    |
| $\beta_{E_2}$ | 0.05–0.3 $day^{-1}$                    | 0.3            | 0.1           | [6]       |
| $m$           | 0.01–0.3 (dimensionless)               | 0.1            | 0.1           | [6]       |
| $\zeta$       | 0.5 (dimensionless)                    | 0.5            | 0.5           | [6]       |
| $\kappa_1$    | $\frac{1}{4} day^{-1}$                 | $\frac{1}{4}$  | $\frac{1}{4}$ | [3, 6]    |
| $\kappa_2$    | 1 $day^{-1}$                           | 1              | 1             | [3]       |
| $q$           | 0.1–0.6 $day^{-1}$                     | 0.3            | 0.2           | Estimated |
| $\rho$        | 0.6–0.7 (dimensionless)                | 0.65           | 0.65          | [6]       |
| $\tau_I$      | $\frac{1}{14} - \frac{1}{5} day^{-1}$  | 1/10           | 1/12          | [5, 6]    |
| $\tau_A$      | $\frac{1}{14} - \frac{1}{5} day^{-1}$  | 1/10           | 1/12          | [5, 6]    |
| $\gamma_I$    | $\frac{1}{14} - \frac{1}{7} day^{-1}$  | 1/10           | 0.143         | [28, 29]  |
| $\gamma_A$    | $\frac{1}{10} - \frac{1}{7} day^{-1}$  | 1/10           | 0.143         | [28, 29]  |
| $\gamma_Q$    | $\frac{1}{21} - \frac{1}{10} day^{-1}$ | 1/17           | 0.071         | [28, 29]  |
| $\gamma_L$    | $\frac{1}{21} - \frac{1}{10} day^{-1}$ | 1/18           | 0.071         | [28, 29]  |
| $\delta_I$    | 0.0001–0.01 $day^{-1}$                 | 0.001          | 0.004         | [2, 5]    |
| $\delta_L$    | 0.0001–0.01 $day^{-1}$                 | 0.001          | 0.0099        | [2, 5]    |
| $\delta_Q$    | 0.0001–0.01 $day^{-1}$                 | 0.001          | 0.007         | [2, 5]    |

Table 4: Calibrated parameters of the proposed model (1) using trust-region-reflective algorithm and daily COVID-19 cases data of Brazil.

It is made available under a [CC-BY-NC-ND 4.0 International license](https://creativecommons.org/licenses/by-nc-nd/4.0/) .

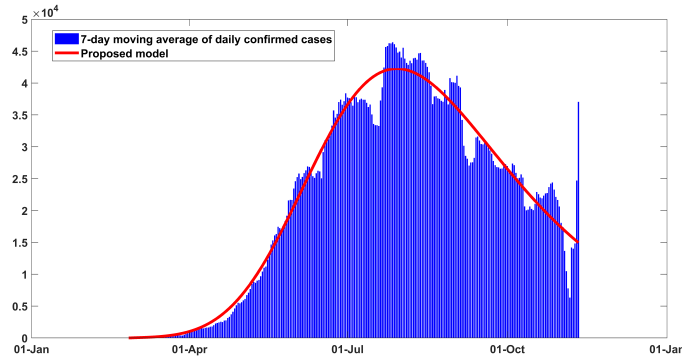

Figure 10: Fitting performance of the model for daily infected cases in Brazil from February 25 to November 11, 2020.

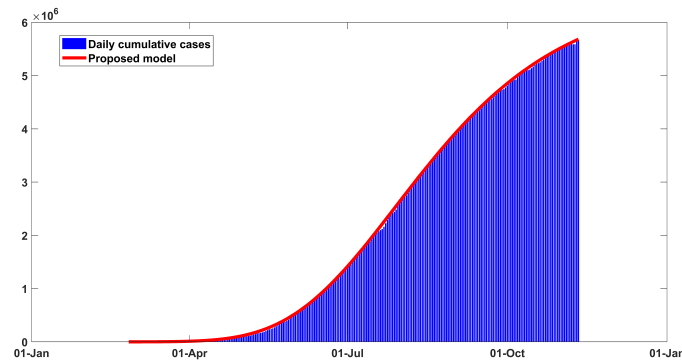

Figure 11: Fitting performance of the model for cumulative infected cases in Brazil from February 25 to November 11, 2020.

#### 162 4.4. Colombia

163 Colombia is one of the hardest-hit countries in Latin America which has already surpassed one million  
164 confirmed coronavirus cases. As of November 15, 2020, Colombia has seen 1,198,746 confirmed cases of  
165 COVID-19 and the country's death toll climbed to 34,031. Our model fitting performance with the historical  
166 data is quite outstanding depicted in Figs. 14 and 15. According to our projection results illustrated in Figs  
167 16 and 17, the tally of cumulative cases could reach approximately 1730K cases and the number of daily  
168 cases could hover around 2000 cases by the end of March 2021. The control reproduction number ( $\mathcal{R}_J$ ) is  
169 estimated to be  $\sim 1.19$  as of November 11, 2020. According to our analysis, the epidemic threshold ( $\mathcal{R}_J$ )  
170 could be brought under unity by the end of December 2020 by following strict distance maintaining protocol  
171 and mass-level usage of efficacious face coverings.

It is made available under a [CC-BY-NC-ND 4.0 International license](https://creativecommons.org/licenses/by-nc-nd/4.0/).

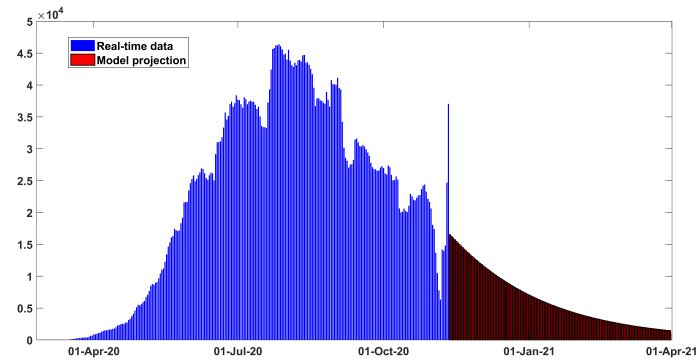

Figure 12: Projection results for daily new confirmed cases for Brazil from early March to late March 2021.

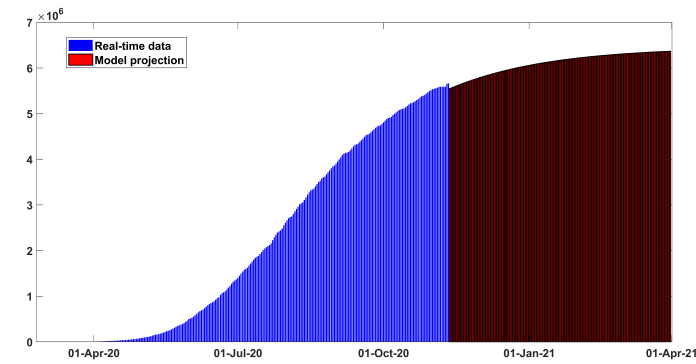

Figure 13: Projection results for cumulative cases for Brazil early March to late March 2021.

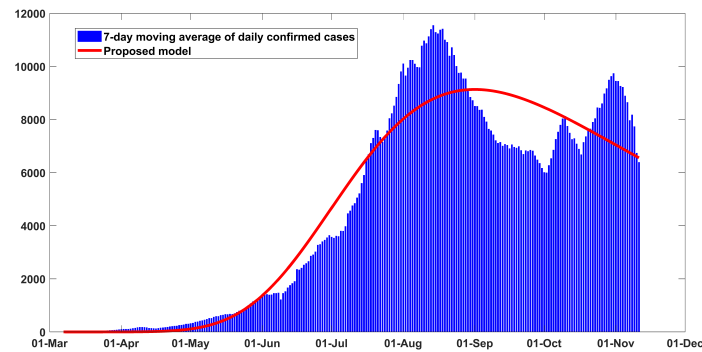

Figure 14: Fitting performance of the model for daily infected cases in Colombia from March 06 to November 11, 2020.

It is made available under a [CC-BY-NC-ND 4.0 International license](https://creativecommons.org/licenses/by-nc-nd/4.0/).

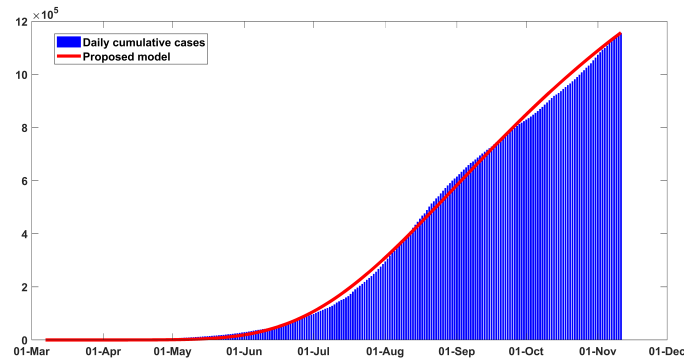

Figure 15: Fitting performance of the model for cumulative infected cases in Colombia from March 06 to November 11, 2020.

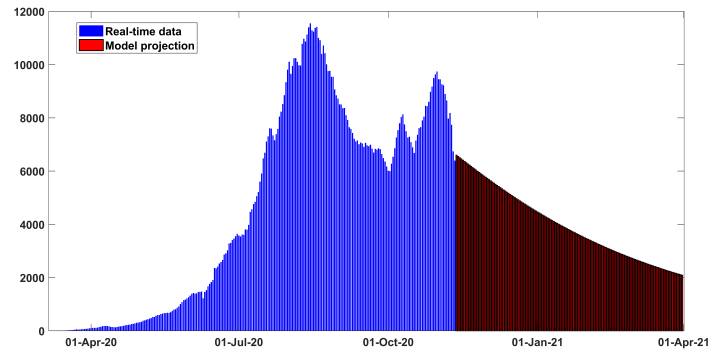

Figure 16: Projection results for daily new confirmed cases for Colombia from early March to late March 2021.

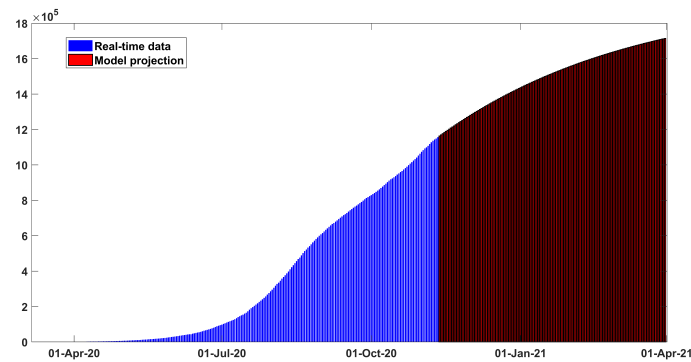

Figure 17: Projection results for cumulative cases for Colombia early March to late March 2021.

| Parameter     | Range (Unit)                           | Baseline value | TRR output    | Reference |
|---------------|----------------------------------------|----------------|---------------|-----------|
| $\beta_I$     | 0.1–1.5 $day^{-1}$                     | 0.55           | 0.11          | [27, 5]   |
| $\beta_A$     | 0.1–0.9 $day^{-1}$                     | 0.3            | 0.1           | [27, 5]   |
| $\beta_Q$     | 0.1–0.9 $day^{-1}$                     | 0.5            | 0.1           | [27, 5]   |
| $\beta_L$     | 0.1–0.9 $day^{-1}$                     | 0.3            | 0.12          | [5, 6]    |
| $\beta_{E_2}$ | 0.05–0.3 $day^{-1}$                    | 0.3            | 0.11          | [6]       |
| $m$           | 0.01–0.3 (dimensionless)               | 0.1            | 0.3           | [6]       |
| $\zeta$       | 0.5 (dimensionless)                    | 0.5            | 0.5           | [6]       |
| $\kappa_1$    | $\frac{1}{4} day^{-1}$                 | $\frac{1}{4}$  | $\frac{1}{4}$ | [3, 6]    |
| $\kappa_2$    | 1 $day^{-1}$                           | 1              | 1             | [3]       |
| $q$           | 0.1–0.6 $day^{-1}$                     | 0.3            | 0.1           | Estimated |
| $\rho$        | 0.6–0.7 (dimensionless)                | 0.65           | 0.65          | [6]       |
| $\tau_I$      | $\frac{1}{14} - \frac{1}{5} day^{-1}$  | 1/10           | 1/9           | [5, 6]    |
| $\tau_A$      | $\frac{1}{14} - \frac{1}{5} day^{-1}$  | 1/10           | 1/11          | [5, 6]    |
| $\gamma_I$    | $\frac{1}{14} - \frac{1}{7} day^{-1}$  | 1/7            | 1/12          | [28, 29]  |
| $\gamma_A$    | $\frac{1}{10} - \frac{1}{7} day^{-1}$  | 1/7            | 1/10          | [28, 29]  |
| $\gamma_Q$    | $\frac{1}{21} - \frac{1}{10} day^{-1}$ | 1/14           | 1/20          | [28, 29]  |
| $\gamma_L$    | $\frac{1}{21} - \frac{1}{10} day^{-1}$ | 1/14           | 1/21          | [28, 29]  |
| $\delta_I$    | 0.0001–0.01 $day^{-1}$                 | 0.001          | 0.0002        | [2, 5]    |
| $\delta_L$    | 0.0001–0.01 $day^{-1}$                 | 0.001          | 0.00058       | [2, 5]    |
| $\delta_Q$    | 0.0001–0.01 $day^{-1}$                 | 0.001          | 0.0005        | [2, 5]    |

Table 5: Calibrated parameters of the proposed model (1) using trust-region-reflective algorithm and daily COVID-19 cases data of Colombia.

#### 172 4.5. India

173 When India is celebrating a busy festival season, the tally of fresh COVID-19 cases continued to rise.  
 174 Relaxation in protective and social-distancing measures could result in a significant upsurge in daily cases  
 175 in upcoming days. Fig. 18 illustrates the fact that India is witnessing a downward trend after having

It is made available under a [CC-BY-NC-ND 4.0 International license](https://creativecommons.org/licenses/by-nc-nd/4.0/) .

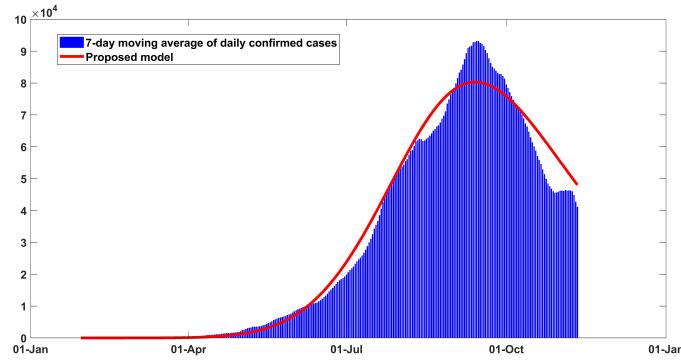

Figure 18: Fitting performance of the model for daily infected cases in India from January 30 to November 11, 2020.

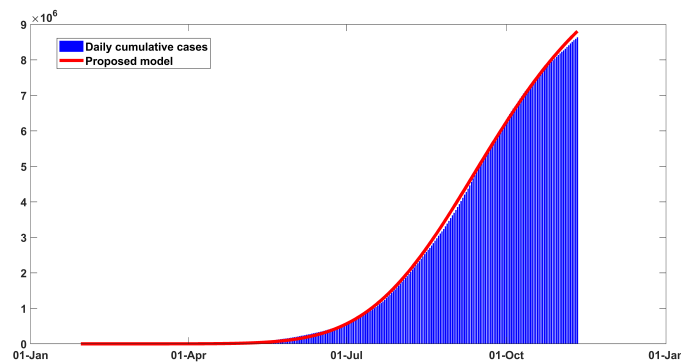

Figure 19: Fitting performance of the model for cumulative infected cases in India from January 30 to November 11, 2020.

176 peak. According to our projection results, India could reel under the second wave of infection unless non-  
177 pharmaceutical interventions strategies are followed comprehensively. As of November 15, the country's  
178 caseload now stands at 8,850,338 and it's death toll has mounted to 130,187. Figs. 18 and 19 illustrate the  
179 fitting performance of our proposed model for India from late January to mid November. Historical data  
180 from January 30 to November 11 have been considered to calibrate the model parameters. As we can see  
181 from the figures, model-fitting is exceptionally well for the historical observed data. Based on our projection  
182 results from Fig. 20, the number of daily cases could be brought under 1000 cases if mass-level efficacious  
183 face coverings is strictly maintained. The control reproduction number  $\mathcal{R}_c$  is estimated to be  $\sim 1.41$  as of  
184 November 11, which complements the prior studied observations [30, 5]. The tally of cumulative infected  
185 cases is projected to reach 11259K by the end of March 2021 if current trend continues. In addition, country's  
186 death toll could mount to 187K over the period. Tab. 6 illustrates the key features used to calibrate this  
187 scenario.

It is made available under a [CC-BY-NC-ND 4.0 International license](https://creativecommons.org/licenses/by-nc-nd/4.0/) .

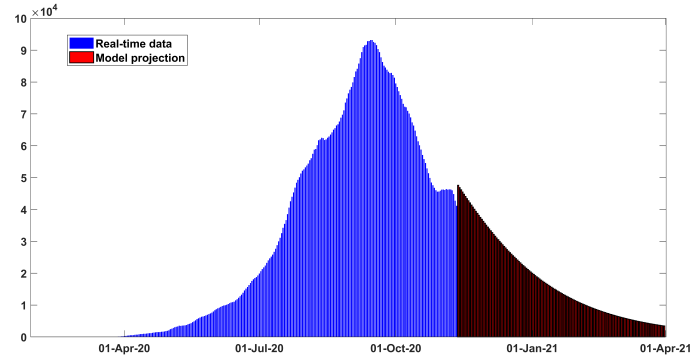

Figure 20: Projection results for daily new confirmed cases for India from late January 2020 to late March 2021.

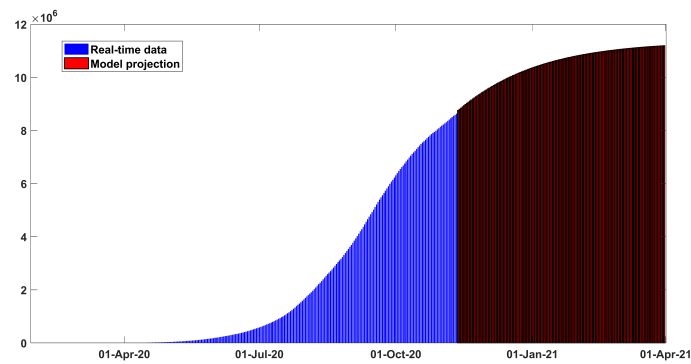

Figure 21: Projection results of cumulative cases for India from late January 2020 to late March 2021.

| Parameter     | Range (Unit)                           | Baseline value | TRR output    | Reference |
|---------------|----------------------------------------|----------------|---------------|-----------|
| $\beta_I$     | 0.1–1.5 $day^{-1}$                     | 0.55           | 0.18          | [27, 5]   |
| $\beta_A$     | 0.1–0.9 $day^{-1}$                     | 0.3            | 0.13          | [27, 5]   |
| $\beta_Q$     | 0.1–0.9 $day^{-1}$                     | 0.5            | 0.2           | [27, 5]   |
| $\beta_L$     | 0.1–0.9 $day^{-1}$                     | 0.3            | 0.22          | [5, 6]    |
| $\beta_{E_2}$ | 0.05–0.3 $day^{-1}$                    | 0.3            | 0.15          | [6]       |
| $m$           | 0.01–0.3 (dimensionless)               | 0.1            | 0.23          | [6]       |
| $\zeta$       | 0.5 (dimensionless)                    | 0.5            | 0.5           | [6]       |
| $\kappa_1$    | $\frac{1}{4} day^{-1}$                 | $\frac{1}{4}$  | $\frac{1}{4}$ | [3, 6]    |
| $\kappa_2$    | 1 $day^{-1}$                           | 1              | 1             | [3]       |
| $q$           | 0.1–0.6 $day^{-1}$                     | 0.3            | 0.25          | Estimated |
| $\rho$        | 0.6–0.7 (dimensionless)                | 0.65           | 0.65          | [6]       |
| $\tau_I$      | $\frac{1}{14} - \frac{1}{5} day^{-1}$  | 1/10           | 1/8           | [5, 6]    |
| $\tau_A$      | $\frac{1}{14} - \frac{1}{5} day^{-1}$  | 1/10           | 1/9           | [5, 6]    |
| $\gamma_I$    | $\frac{1}{14} - \frac{1}{7} day^{-1}$  | 1/7            | 1/12          | [28, 29]  |
| $\gamma_A$    | $\frac{1}{10} - \frac{1}{7} day^{-1}$  | 1/7            | 1/10          | [28, 29]  |
| $\gamma_Q$    | $\frac{1}{21} - \frac{1}{10} day^{-1}$ | 1/14           | 1/16          | [28, 29]  |
| $\gamma_L$    | $\frac{1}{21} - \frac{1}{10} day^{-1}$ | 1/14           | 1/18          | [28, 29]  |
| $\delta_I$    | 0.0001–0.01 $day^{-1}$                 | 0.001          | 0.0002        | [2, 5]    |
| $\delta_L$    | 0.0001–0.01 $day^{-1}$                 | 0.001          | 0.00032       | [2, 5]    |
| $\delta_Q$    | 0.0001–0.01 $day^{-1}$                 | 0.001          | 0.0003        | [2, 5]    |

Table 6: Calibrated parameters of the proposed model (1) using trust-region-reflective algorithm and daily COVID-19 cases data of India.

## 188 5. Global sensitivity analysis

189 With an aim to quantify the most dominant mechanisms in the proposed model, a renowned global sen-  
 190 sitivity analysis approach Partial Rank Correlation Coefficient (PRCC) method has been carried out. This



191 method can provide considerable insights about the relationship between model responses (state variables)  
192 and model parameters (sampled by Latin Hypercube Sampling method) in an outbreak setting [31]. PRCC  
193 values are generally bounded between -1 and 1. A monotonic relationship between the model input paramete-  
194 ters and the model outputs is generally assumed in this method. Apart from qualitative relationship, precise  
195 quantitative impact of different parameters on model responses can be determined by calculating the PRCC  
196 values. Uniform distribution of all model parameters have been considered to generate LHS matrices. A  
197 positive PRCC value depicts that the model output can be increased by increasing the respective model input  
198 parameter. Similarly, model output can be decreased by forcing down the corresponding input parameter.  
199 In addition, a negative PRCC value indicates a negative correlation between the model input and output.

200 When it comes to analyse a complex model, it often get really challenging to control the parameters.  
201 In this context, sensitivity analysis can give considerable insights regarding the quantitative relationship  
202 between model responses and model input parameters. However, it is really challenging for complex models  
203 to determine the qualitative and quantitative relationship with sufficient accuracy. As we can see from Figure  
204 22, nearly the same qualitative relationship has been found between the number of symptomatic infectious  
205 individuals (one of the crucial model responses) and three parameters which are effective contact rate with  
206 isolated infected individuals ( $\beta_L$ ), efficacy of face coverings ( $\zeta$ ) and face coverings compliance for our studied  
207 five countries. The public health implications of these findings are the dynamics of COVID-19 could be  
208 controlled by encouraging mass-level usage of efficacious face coverings. In addition, the high significance of  
209  $\beta_L$  indicates that immediate isolation of detected patients is highly required.

## 210 6. Solution of the model in Caputo-Fabrizio fractional derivative sense

### 211 6.1. Preliminaries

212 Here we recall the definitions of Caputo and Caputo-Fabrizio fractional derivatives.

**Definition 1.** [32] The Caputo definition of non-integer order derivative of order  $\varrho > 0$  of a function  $G : (0, \infty) \rightarrow \mathbb{R}$  is defined by

$$D_t^\varrho G(t) = \frac{1}{\Gamma(n - \varrho)} \int_0^t (t - \tau)^{n - \varrho - 1} G^n(\tau) d\tau \quad (12)$$

213 where  $n = [\varrho] + 1$  and  $[\varrho]$  is the integer part of  $\varrho$ .

**Definition 2.** [33, 34] For  $G \in H^1(c, d)$  and  $0 < \varrho < 1$ , the Caputo-Fabrizio (CF) fractional derivative (FD) of order  $\varrho$  is defined by

$${}_c^{CF} D_t^\varrho G(t) = \frac{1}{1 - \varrho} \int_c^t \frac{dG(\eta)}{d\eta} \exp[-\theta(t - \eta)] d\eta$$

where  $\theta = \frac{\varrho}{1 - \varrho}$

The CF non-integer order integral is defined as

$${}_c^{CF} I_t^\varrho G(t) = (1 - \varrho)G(t) + \varrho \int_c^t G(\eta) d\eta.$$

It is made available under a [CC-BY-NC-ND 4.0 International license](https://creativecommons.org/licenses/by-nc-nd/4.0/).

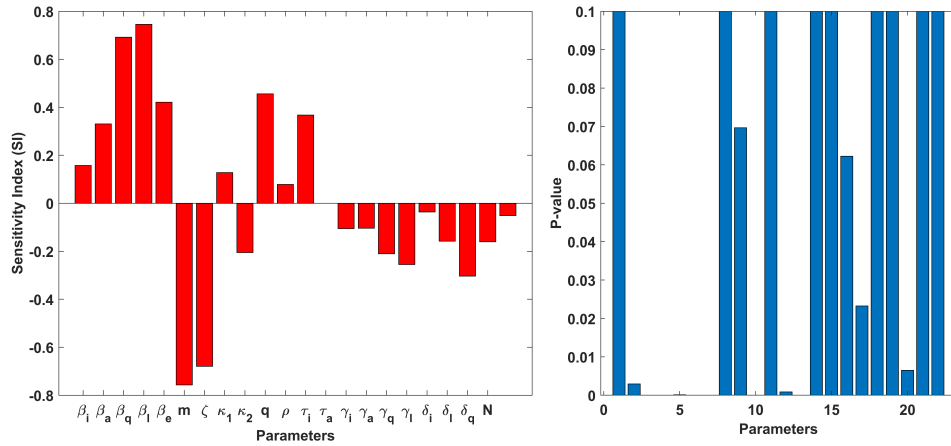

(a) Sensitivity analysis for Argentina

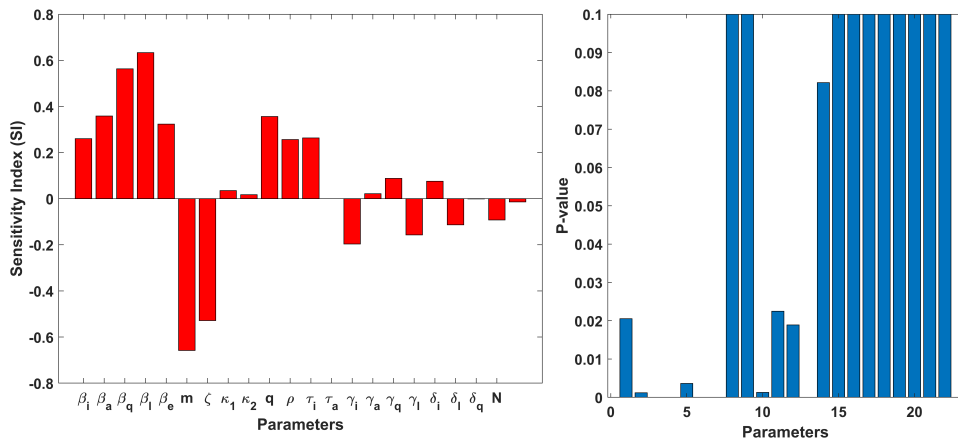

(b) Sensitivity analysis for Bangladesh

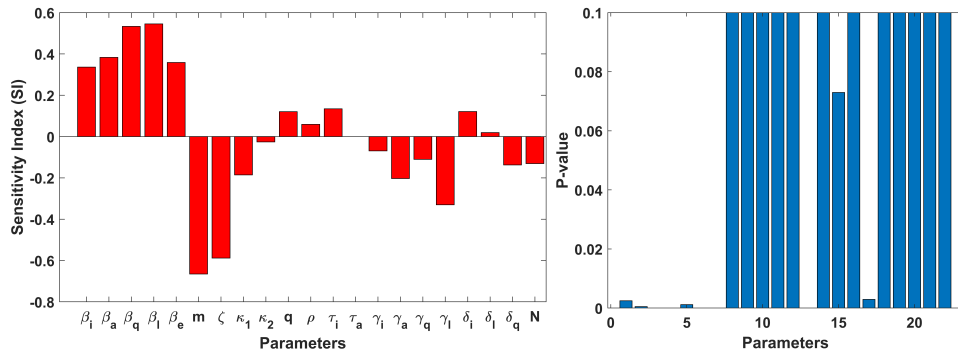

(c) Sensitivity analysis for Brazil

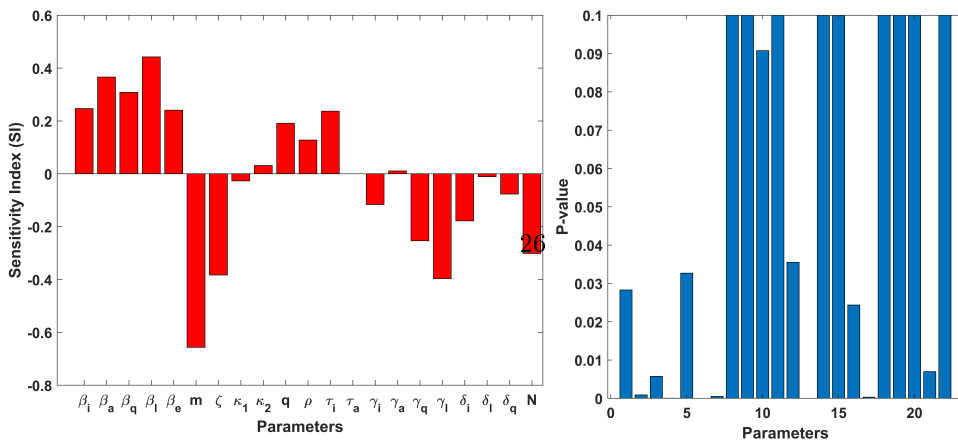

214 6.2. Existence and uniqueness analysis

Now, we prove the existence of unique solution for the given COVID-19 model in the sense of Caputo-Fabrizio fractional derivative by the application of fixed-point theory. In this concern, the proposed system can be rewritten in the equivalent form as follows:

$$\begin{cases} {}^{CF}D_t^\varrho S(t) = \mathcal{G}_1(t, S(t)), \\ {}^{CF}D_t^\varrho E_1(t) = \mathcal{G}_2(t, E_1(t)), \\ {}^{CF}D_t^\varrho E_2(t) = \mathcal{G}_3(t, E_2(t)), \\ {}^{CF}D_t^\varrho I(t) = \mathcal{G}_4(t, I(t)), \\ {}^{CF}D_t^\varrho A(t) = \mathcal{G}_5(t, A(t)), \\ {}^{CF}D_t^\varrho Q(t) = \mathcal{G}_6(t, Q(t)), \\ {}^{CF}D_t^\varrho L(t) = \mathcal{G}_7(t, L(t)), \\ {}^{CF}D_t^\varrho R(t) = \mathcal{G}_8(t, R(t)), \\ {}^{CF}D_t^\varrho D(t) = \mathcal{G}_9(t, D(t)). \end{cases} \quad (13)$$

By applying the CF non-integer order integral operator, the above system (13), reduces to the following integral equation of Volterra type of order  $0 < \varrho < 1$ .

$$\begin{aligned} S(t) - S(0) &= (1 - \varrho)G_1(t, S) + \varrho \int_0^t \mathcal{G}_1(\chi, S) d\chi, \\ E_1(t) - E_1(0) &= (1 - \varrho)G_2(t, E_1) + \varrho \int_0^t \mathcal{G}_2(\chi, E_1) d\chi, \\ E_2(t) - E_2(0) &= (1 - \varrho)G_3(t, E_2) + \varrho \int_0^t \mathcal{G}_3(\chi, E_2) d\chi, \\ I(t) - I(0) &= (1 - \varrho)G_4(t, I) + \varrho \int_0^t \mathcal{G}_4(\chi, I) d\chi, \\ A(t) - A(0) &= (1 - \varrho)G_5(t, A) + \varrho \int_0^t \mathcal{G}_5(\chi, A) d\chi, \\ Q(t) - Q(0) &= (1 - \varrho)G_6(t, Q) + \varrho \int_0^t \mathcal{G}_6(\chi, Q) d\chi, \\ L(t) - L(0) &= (1 - \varrho)G_7(t, L) + \varrho \int_0^t \mathcal{G}_7(\chi, L) d\chi, \\ R(t) - R(0) &= (1 - \varrho)G_8(t, R) + \varrho \int_0^t \mathcal{G}_8(\chi, R) d\chi, \\ D(t) - D(0) &= (1 - \varrho)G_9(t, D) + \varrho \int_0^t \mathcal{G}_9(\chi, D) d\chi. \end{aligned} \quad (14)$$

Now, we get the subsequent iterative algorithm

$$\begin{aligned}
 S_{n+1}(t) &= (1 - \varrho)\mathcal{G}_1(t, S_n) + \varrho \int_0^t \mathcal{G}_1(\chi, S_n)d\chi, \\
 E_{1n+1}(t) &= (1 - \varrho)\mathcal{G}_2(t, E_{1n}) + \varrho \int_0^t \mathcal{G}_2(\chi, E_{1n})d\chi, \\
 E_{2n+1}(t) &= (1 - \varrho)\mathcal{G}_3(t, E_{2n}) + \varrho \int_0^t \mathcal{G}_3(\chi, E_{2n})d\chi, \\
 I_{n+1}(t) &= (1 - \varrho)\mathcal{G}_4(t, I_n) + \varrho \int_0^t \mathcal{G}_4(\chi, I_n)d\chi, \\
 A_{n+1}(t) &= (1 - \varrho)\mathcal{G}_5(t, A_n) + \varrho \int_0^t \mathcal{G}_5(\chi, A_n)d\chi, \\
 Q_{n+1}(t) &= (1 - \varrho)\mathcal{G}_6(t, Q_n) + \varrho \int_0^t \mathcal{G}_6(\chi, Q_n)d\chi, \\
 L_{n+1}(t) &= (1 - \varrho)\mathcal{G}_7(t, L_n) + \varrho \int_0^t \mathcal{G}_7(\chi, L_n)d\chi, \\
 R_{n+1}(t) &= (1 - \varrho)\mathcal{G}_8(t, R_n) + \varrho \int_0^t \mathcal{G}_8(\chi, R_n)d\chi, \\
 D_{n+1}(t) &= (1 - \varrho)\mathcal{G}_9(t, D_n) + \varrho \int_0^t \mathcal{G}_9(\chi, D_n)d\chi.
 \end{aligned} \tag{15}$$

215 Here we assume that we can get the exact solution by taking the limit as n tends to infinity.

216 *6.2.1. Existence analysis by using Picard-Lindelof approach*

Let us consider

$$\begin{aligned}
 F_1 &= \sup_{\mathcal{C}_{[c, z_1]}} \| \mathcal{G}_1(t, S) \|, F_2 = \sup_{\mathcal{C}_{[c, z_2]}} \| \mathcal{G}_2(t, E_1) \|, F_3 = \sup_{\mathcal{C}_{[c, z_3]}} \| \mathcal{G}_3(t, E_2) \|, F_4 = \sup_{\mathcal{C}_{[c, z_4]}} \| \mathcal{G}_4(t, I) \|, \\
 F_5 &= \sup_{\mathcal{C}_{[c, z_5]}} \| \mathcal{G}_5(t, A) \|, F_6 = \sup_{\mathcal{C}_{[c, z_6]}} \| \mathcal{G}_6(t, Q) \|, F_7 = \sup_{\mathcal{C}_{[c, z_7]}} \| \mathcal{G}_7(t, L) \|, F_8 = \sup_{\mathcal{C}_{[c, z_8]}} \| \mathcal{G}_8(t, R) \|, \\
 F_9 &= \sup_{\mathcal{C}_{[c, z_9]}} \| \mathcal{G}_9(t, D) \|,
 \end{aligned} \tag{16}$$

where

$$\begin{aligned}
 \mathcal{C}_{c, z_1} &= |t - c, t + c| \times [S - z_1, S + z_1] = D_1 \times B_1, \\
 \mathcal{C}_{c, z_2} &= |t - c, t + c| \times [E_1 - z_2, E_1 + z_2] = D_1 \times B_2, \\
 \mathcal{C}_{c, z_3} &= |t - c, t + c| \times [E_2 - z_3, E_2 + z_3] = D_1 \times B_3, \\
 \mathcal{C}_{c, z_4} &= |t - c, t + c| \times [I - z_4, I + z_4] = D_1 \times B_4, \\
 \mathcal{C}_{c, z_5} &= |t - c, t + c| \times [A - z_5, A + z_5] = D_1 \times B_5, \\
 \mathcal{C}_{c, z_6} &= |t - c, t + c| \times [Q - z_6, Q + z_6] = D_1 \times B_6, \\
 \mathcal{C}_{c, z_7} &= |t - c, t + c| \times [L - z_7, L + z_7] = D_1 \times B_7, \\
 \mathcal{C}_{c, z_8} &= |t - c, t + c| \times [R - z_8, R + z_8] = D_1 \times B_8, \\
 \mathcal{C}_{c, z_9} &= |t - c, t + c| \times [D - z_9, D + z_9] = D_1 \times B_9.
 \end{aligned} \tag{17}$$

considering the Picard operator as

$\phi : C(D_1, B_1, B_2, B_3, B_4, B_5, B_6, B_7, B_8, B_9) \rightarrow C(D_1, B_1, B_2, B_3, B_4, B_5, B_6, B_7, B_8, B_9)$ , given as follows:

$$\phi\zeta(t) = \zeta_0(t) + \Delta(t, \zeta(t))(1 - \varrho) + \varrho \int_0^t \Delta(s, \zeta(s))ds,$$

where  $\zeta(t) = \{S(t), E_1(t), E_2(t), I(t), A(t), Q(t), L(t), R(t), D(t)\}$ ,  $\zeta_0(t) = \{S_0, E_{10}, E_{20}, I_0, A_0, Q_0, L_0, R_0, D_0\}$  and  $\Delta(t, \zeta(t)) = \{\mathcal{G}_1(t, S(t)), \mathcal{G}_2(t, E_1(t)), \mathcal{G}_3(t, E_2(t)), \mathcal{G}_4(t, I(t)), \mathcal{G}_5(t, A(t)), \mathcal{G}_6(t, Q(t)), \mathcal{G}_7(t, L(t)), \mathcal{G}_8(t, R(t)), \mathcal{G}_9(t, D(t))\}$ . Next we assume that the solution of the non-integer order model are bounded within a time period,

$$\|\zeta(t)\|_\infty \leq \max\{z_1, z_2, z_3, z_4, z_5, z_6, z_7, z_8, z_9, \},$$

$$\|\zeta(t) - \zeta_0(t)\| = \|\Delta(t, \zeta(t))(1 - \varrho) + \varrho \int_0^t \Delta(s, \zeta(s))ds\|$$

$$\leq \|\Delta(t, \zeta(t))\| (1 - \varrho) + \varrho \int_0^t \|\Delta(s, \zeta(s))\| ds$$

$$\leq \left( (1 - \varrho) + \varrho\zeta_0 \right) \max\{F_1, F_2, F_3, F_4, F_5, F_6, F_7, F_8, F_9\} < bF \leq d = \max\{z_1, z_2, z_3, z_4, z_5, z_6, z_7, z_8, z_9\},$$

where we demand that

$b < \frac{d}{F}$ . Now by the application of fixed point theorem pertaining to Banach space along with the metric, we obtain

$\|\phi\zeta_1 - \phi\zeta_2\|_\infty = \sup_{t \rightarrow B} |\zeta_1 - \zeta_2|$ . Now we have

$$\begin{aligned} \|\phi\zeta_1 - \phi\zeta_2\| &= \|\{\Delta(t, \zeta_1(t)) - \Delta(t, \zeta_2(t))\}(1 - \varrho) + \varrho \int_0^t \{\Delta(s, \zeta_1(s)) - \Delta(s, \zeta_2(s))\}ds\| \\ &\leq \|\Delta(t, \zeta_1(t)) - \Delta(t, \zeta_2(t))\| (1 - \varrho) + \varrho \int_0^t \|\Delta(s, \zeta_1(s)) - \Delta(s, \zeta_2(s))\| ds \\ &\leq (1 - \varrho)\beta \|\zeta_1(t) - \zeta_2(t)\| + \varrho\beta \int_0^t \|\zeta_1(s) - \zeta_2(s)\| ds \\ &\leq \{(1 - \varrho)\beta + \varrho\beta t_0\} \|\zeta_1(t) - \zeta_2(t)\| \\ &\leq \mathcal{U}\beta \|\zeta_1(t) - \zeta_2(t)\|, \end{aligned} \tag{18}$$

217 with  $\beta < 1$ . Since  $\zeta$  is a contraction, we have  $\mathcal{U}\beta < 1$ , hence the given operator  $\phi$  is also a contraction.

218 Therefore, the model involving C-F derivative given in Eq. (13) has a unique set of solution.

### 219 6.3. Solution method in Caputo-Fabrizio Operator

We now derive the solution method for  $I(t)$  equation of the system (13) and for the rest of the equations it will be similar. The corresponding Volterra integral equation for  $I(t)$  is as follows.

$$I(t) = I(0) + (1 - \varrho)\mathcal{G}_4(t, I(t)) + \varrho \int_0^t \mathcal{G}_4(s, I(s))ds \tag{19}$$

We have the following estimations at  $t_k$

$$I(t_k) = I_0 + (1 - \varrho)\mathcal{G}_4(t_{k-1}, I(t_{k-1})) + \varrho \int_0^{t_k} \mathcal{G}_4(t, I(t))dt, \quad (20)$$

and at  $t_{k+1}$

$$I(t_{k+1}) = I_0 + (1 - \varrho)\mathcal{G}_4(t_k, I(t_k)) + \varrho \int_0^{t_{k+1}} \mathcal{G}_4(t, I(t))dt. \quad (21)$$

Subtracting equation (21) from (20), we obtain

$$I(t_{k+1}) - I(t_k) = (1 - \varrho) (\mathcal{G}_4(t_k, I(t_k)) - \mathcal{G}_4(t_{k-1}, I(t_{k-1}))) + \varrho \int_{t_k}^{t_{k+1}} \mathcal{G}_4(t, I(t))dt. \quad (22)$$

Then by linear interpolation about  $\mathcal{G}_4(t, I(t))$  and applying trapezoid rule for integration on the integral term, we can then write

$$\int_{t_k}^{t_{k+1}} \mathcal{G}_4(t, I(t))dt \cong \frac{3\Delta t}{2} \mathcal{G}_4(t_k, I(t_k)) - \frac{\Delta t}{2} \mathcal{G}_4(t_k, I(t_k)) \quad (23)$$

where  $\Delta t = t_k - t_{k-1}$ . Hence, we have the numerical approximation for equation of  $I(t)$  as

$$I(t_{k+1}) = I(t_k) + \left(1 - \varrho + \frac{3\varrho\Delta t}{2}\right) \mathcal{G}_4(t_k, I(t_k)) - \left(1 - \varrho + \frac{\varrho\Delta t}{2}\right) \mathcal{G}_4(t_{k-1}, I(t_{k-1})). \quad (24)$$

**Theorem 5.** The numerical approximation (24) is unconditionally stable if

$$\|\mathcal{G}_4(t_{k+1}, I(t_{k+1})) - \mathcal{G}_4(t_k, I(t_k))\| \rightarrow 0.$$

*Proof.* Let  $I(t)$  be the solution of a differential equation as shown in (19) under CF non-integer order derivative operator sense. Then we have to evaluate the norm

$$\begin{aligned} \|I(t_{k+1}) - I(t_k)\| &= \left\| (1 - \varrho) (\mathcal{G}_4(t_k, I(t_k)) - \mathcal{G}_4(t_{k-1}, I(t_{k-1}))) + \varrho \int_{t_k}^{t_{k+1}} \mathcal{G}_4(\eta, I(\eta))d\eta \right\| \\ &\leq (1 - \varrho) \|(\mathcal{G}_4(t_k, I(t_k)) - \mathcal{G}_4(t_{k-1}, I(t_{k-1})))\| + \varrho \left\| \int_{t_k}^{t_{k+1}} \mathcal{G}_4(\eta, I(\eta))d\eta \right\|. \end{aligned} \quad (25)$$

For  $k \rightarrow \infty$ , we have

$$\begin{aligned} \|I(t_{k+1}) - I(t_k)\|_\infty &\leq \lim_{k \rightarrow \infty} (1 - \varrho) \|(\mathcal{G}_4(t_k, I(t_k)) - \mathcal{G}_4(t_{k-1}, I(t_{k-1})))\| + \lim_{k \rightarrow \infty} \varrho \left\| \int_{t_k}^{t_{k+1}} \mathcal{G}_4(\eta, I(\eta))d\eta \right\| \\ &< \lim_{k \rightarrow \infty} (1 - \varrho) \|(\mathcal{G}_4(t_k, I(t_k)) - \mathcal{G}_4(t_{k-1}, I(t_{k-1})))\| \\ &\quad + \lim_{k \rightarrow \infty} \varrho \int_{t_k}^{t_{k+1}} \left| \sum_{j=0}^k \prod_{j=0}^k \frac{\eta - t_j}{\Delta t} \mathcal{G}_4(t_j, I(t_j)) \right| d\eta \end{aligned}$$

220 Clearly, the second term of the above inequality approaches zero when  $k \rightarrow \infty$ . Now, if  $\|\mathcal{G}_4(t_{k+1}, I(t_{k+1})) -$   
 221  $\mathcal{G}_4(t_k, I(t_k))\| \rightarrow 0$  as  $k \rightarrow \infty$ , we deduce that the numerical solution is stable.  $\square$

222 *6.4. Graphical simulations*

223 After giving the all necessary theoretical concerns, now we do the graphical simulations via CF fractional  
224 derivative. In our paper, we are using the real numerical data of COVID-19 for five different countries named  
225 as Argentina, Bangladesh, Brazil, Colombia and India respectively. Here first we perform the graphs for  
226 Argentina COVID-19 cases. To perform numerical simulations, we use parameter values summarize in Table  
227 2. In the family of Figure 23, we analysed the plots of  $S(t)$ ,  $E_1(t)$ ,  $E_2(t)$ ,  $I(t)$ ,  $A(t)$  and  $Q(t)$ . We observed  
228 that for different fractional order values peaks are well defined and when we decrease the fractional order  
229 then the peaks sifted towards the later time period. In the group of Figs. 24- 25, first we show the nature of  
230  $L(t)$ ,  $R(t)$ ,  $D(t)$  and then analysed the plots of  $I(t)$  versus  $S(t)$ ,  $A(t)$ ,  $Q(t)$ ,  $L(t)$  and  $R(t)$ . In the comparison  
231 of given classes with infected individuals, we see that when the infectious  $I(t)$  increases then asymptomatic  
232 infectious  $A(t)$  also increases with same nature. In sub-figs. 24d- 25b, we see that the fractional order does  
233 not play any big role because the nature of the classes is nearly same at all different fractional order values  
234  $\rho$ . Initial values of given classes for Argentina are  $S(0) = 45333107$ ,  $E_1(0) = 10$ ,  $E_2(0) = 4$ ,  $I(0) = 2$ ,  $A(0) =$   
235  $1$ ,  $Q(0) = 0$ ,  $L(0) = 0$ ,  $R(0) = 0$  and  $D(0) = 0$ . We have used the total population of the country for  $S(0)$ .

It is made available under a [CC-BY-NC-ND 4.0 International license](https://creativecommons.org/licenses/by-nc-nd/4.0/).

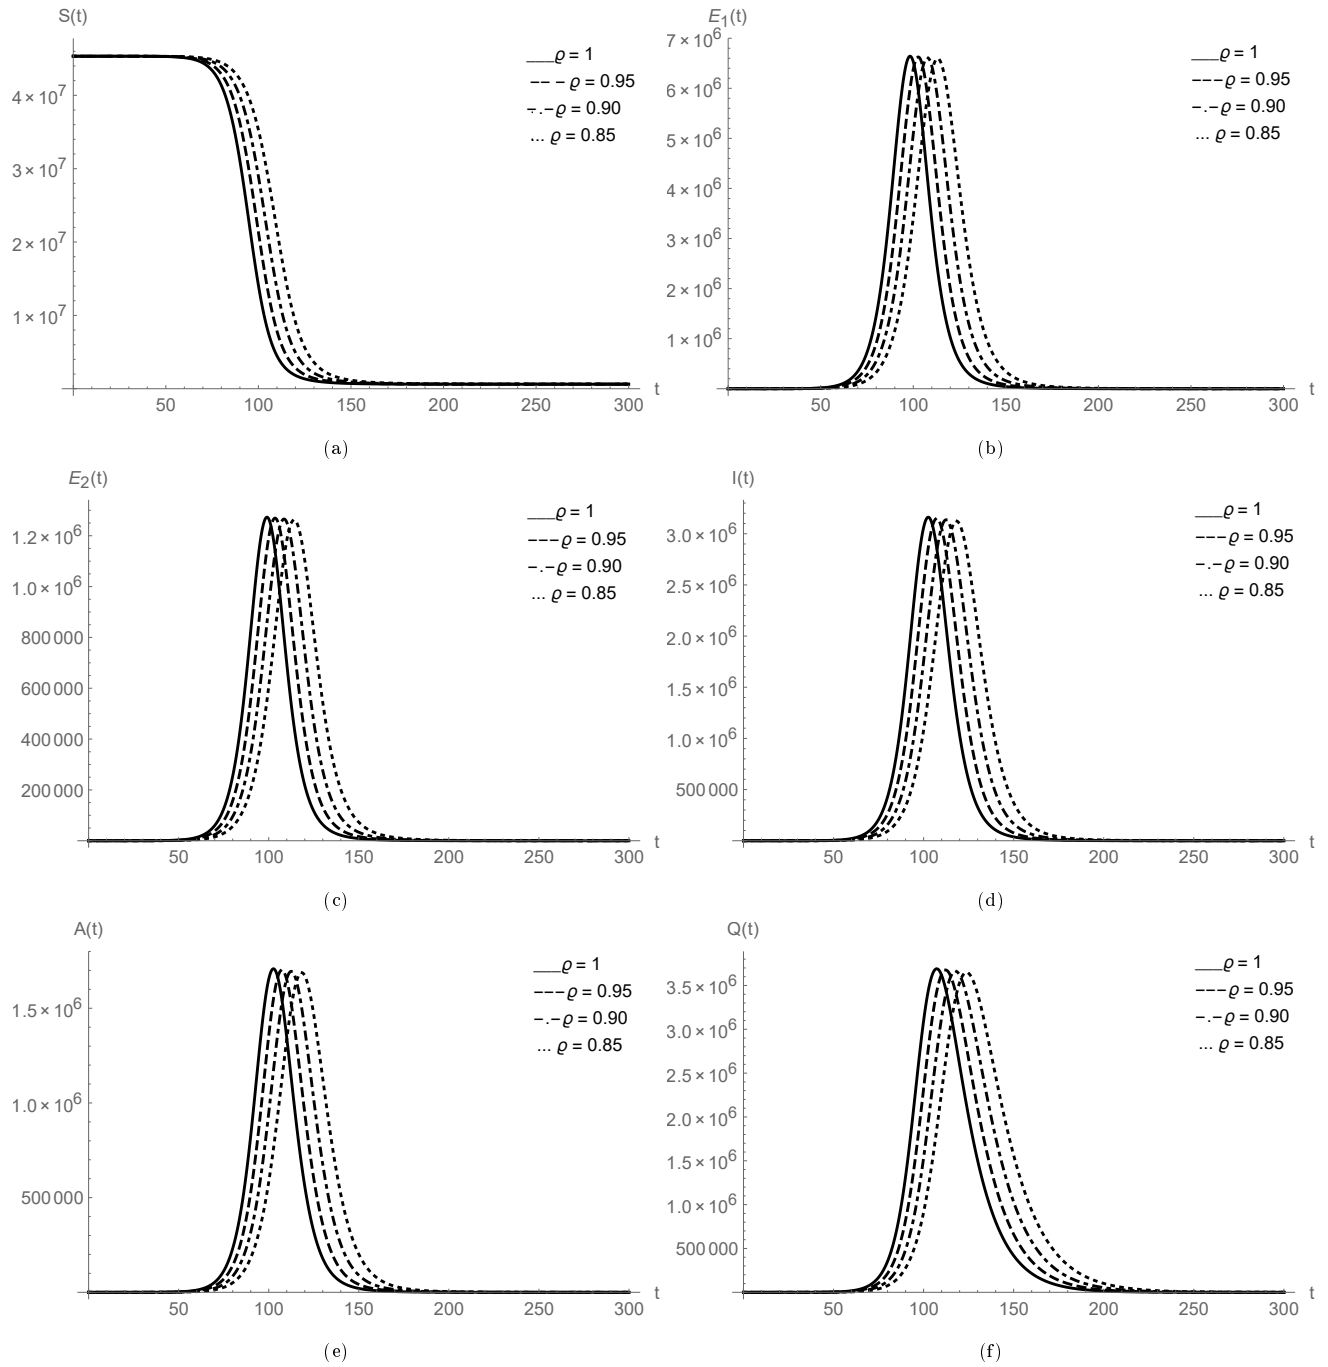

Figure 23: Plots of  $S(t)$ ,  $E_1(t)$ ,  $E_2(t)$ ,  $I(t)$ ,  $A(t)$  and  $Q(t)$  for Argentina data



It is made available under a [CC-BY-NC-ND 4.0 International license](https://creativecommons.org/licenses/by-nc-nd/4.0/).

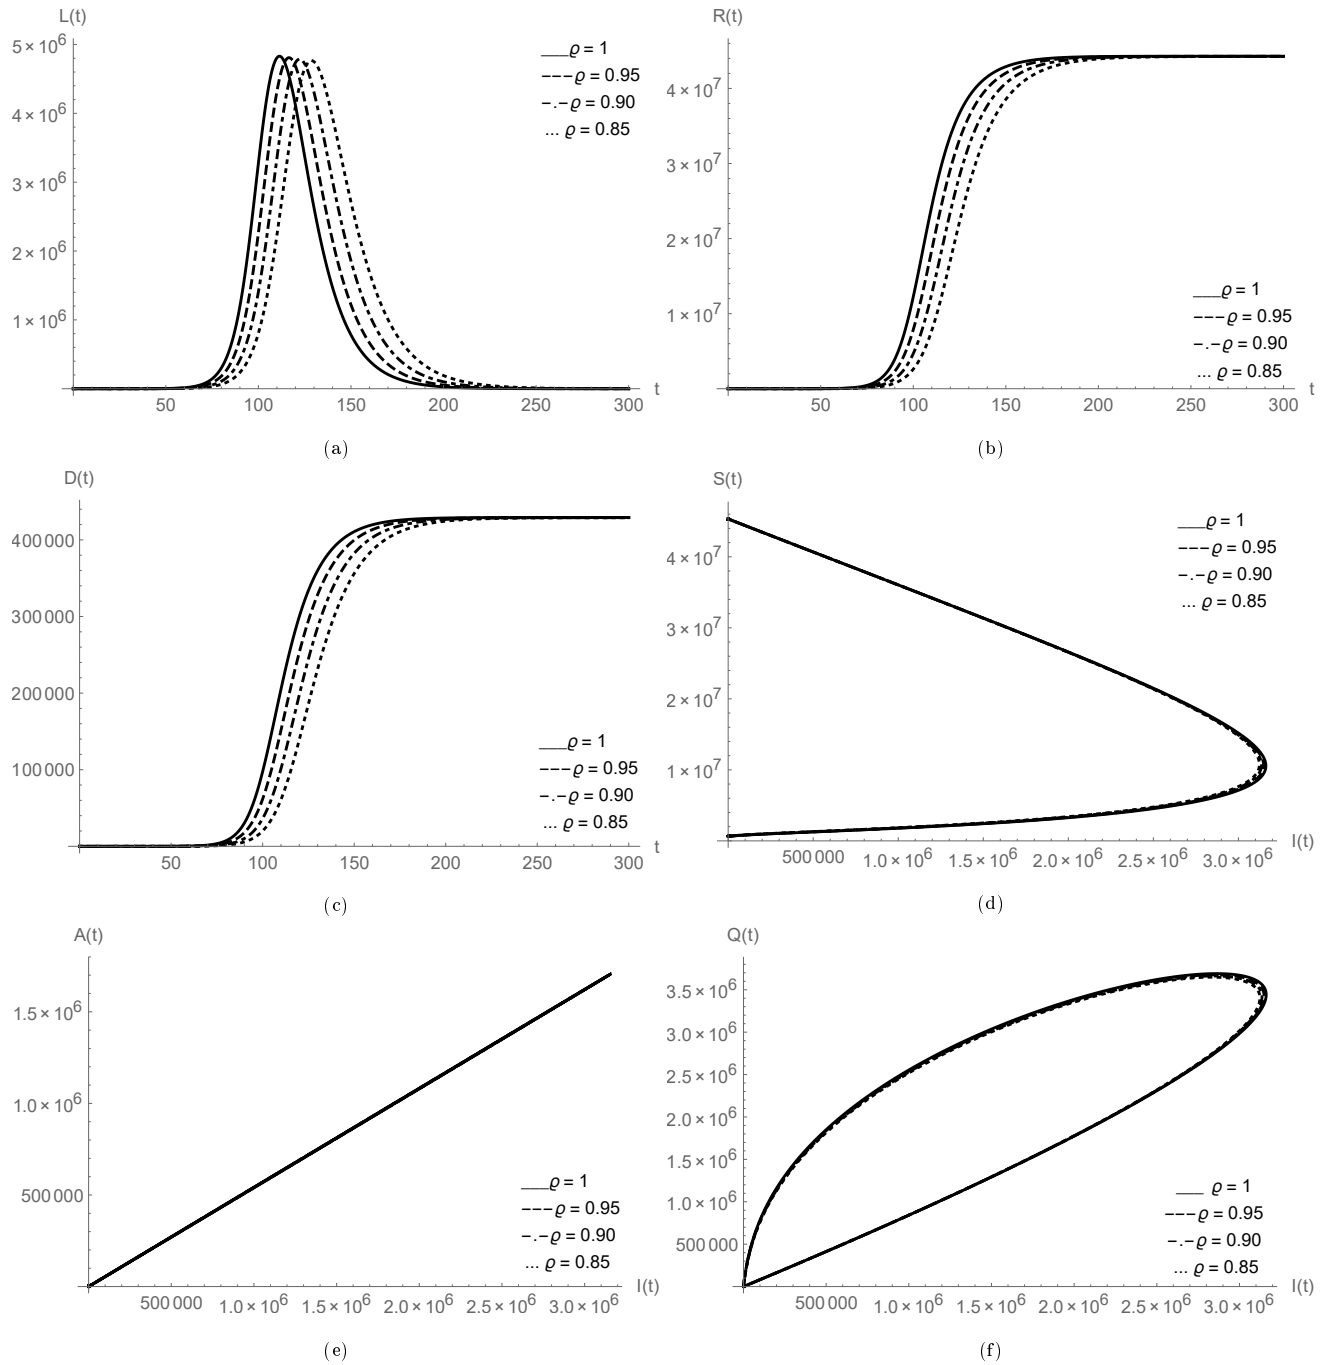

Figure 24: Plots of  $L(t)$ ,  $R(t)$ ,  $D(t)$  and relationship of  $I(t)$  versus  $S(t)$ ,  $A(t)$ ,  $Q(t)$ ,  $L(t)$ ,  $R(t)$  for Argentina data

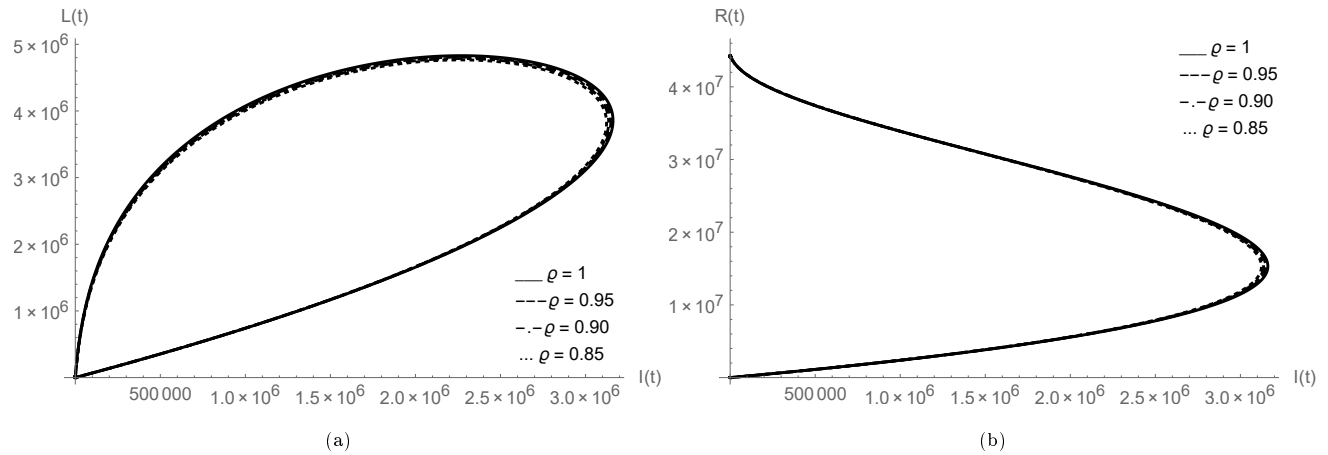

Figure 25:  $I(t)$  versus  $L(t), R(t)$  for Argentina data

236 Now we perform the graphs for COVID-19 cases in Bangladesh. To perform numerical simulations,  
 237 we use parameter values summarize in Table 3. In the family of Figure 26, we analysed the plots of  
 238  $S(t), E_1(t), E_2(t), I(t), A(t)$  and  $Q(t)$ . We observed that for different fractional order values peaks are well  
 239 defined and when we decrease the fractional order then the peaks sifted towards the later time period.  
 240 In the group of Figures 27- 28, first we show the nature of  $L(t), R(t), D(t)$  and then analysed the plots  
 241 of  $I(t)$  versus  $S(t), A(t), Q(t), L(t)$  and  $R(t)$ . In the comparison of given classes with infected individu-  
 242 als, we see that the nature of infectious  $I(t)$  is same as for Argentina, as when the population of infected  
 243 individuals increases then asymptomatic infectious  $A(t)$  also increases with same nature. In sub-figures  
 244 27d- 28b, we see that the fractional order does not play any big role because the nature of the classes  
 245 is nearly same at all different fractional order values  $\rho$ . Initial values of given classes for Bangladesh are  
 246  $S(0) = 164689383, E_1(0) = 10, E_2(0) = 4, I(0) = 2, A(0) = 1, Q(0) = 0, L(0) = 0, R(0) = 0$  and  $D(0) = 0$ .  
 247 We have used the total population of the country for  $S(0)$ .

It is made available under a [CC-BY-NC-ND 4.0 International license](https://creativecommons.org/licenses/by-nc-nd/4.0/).

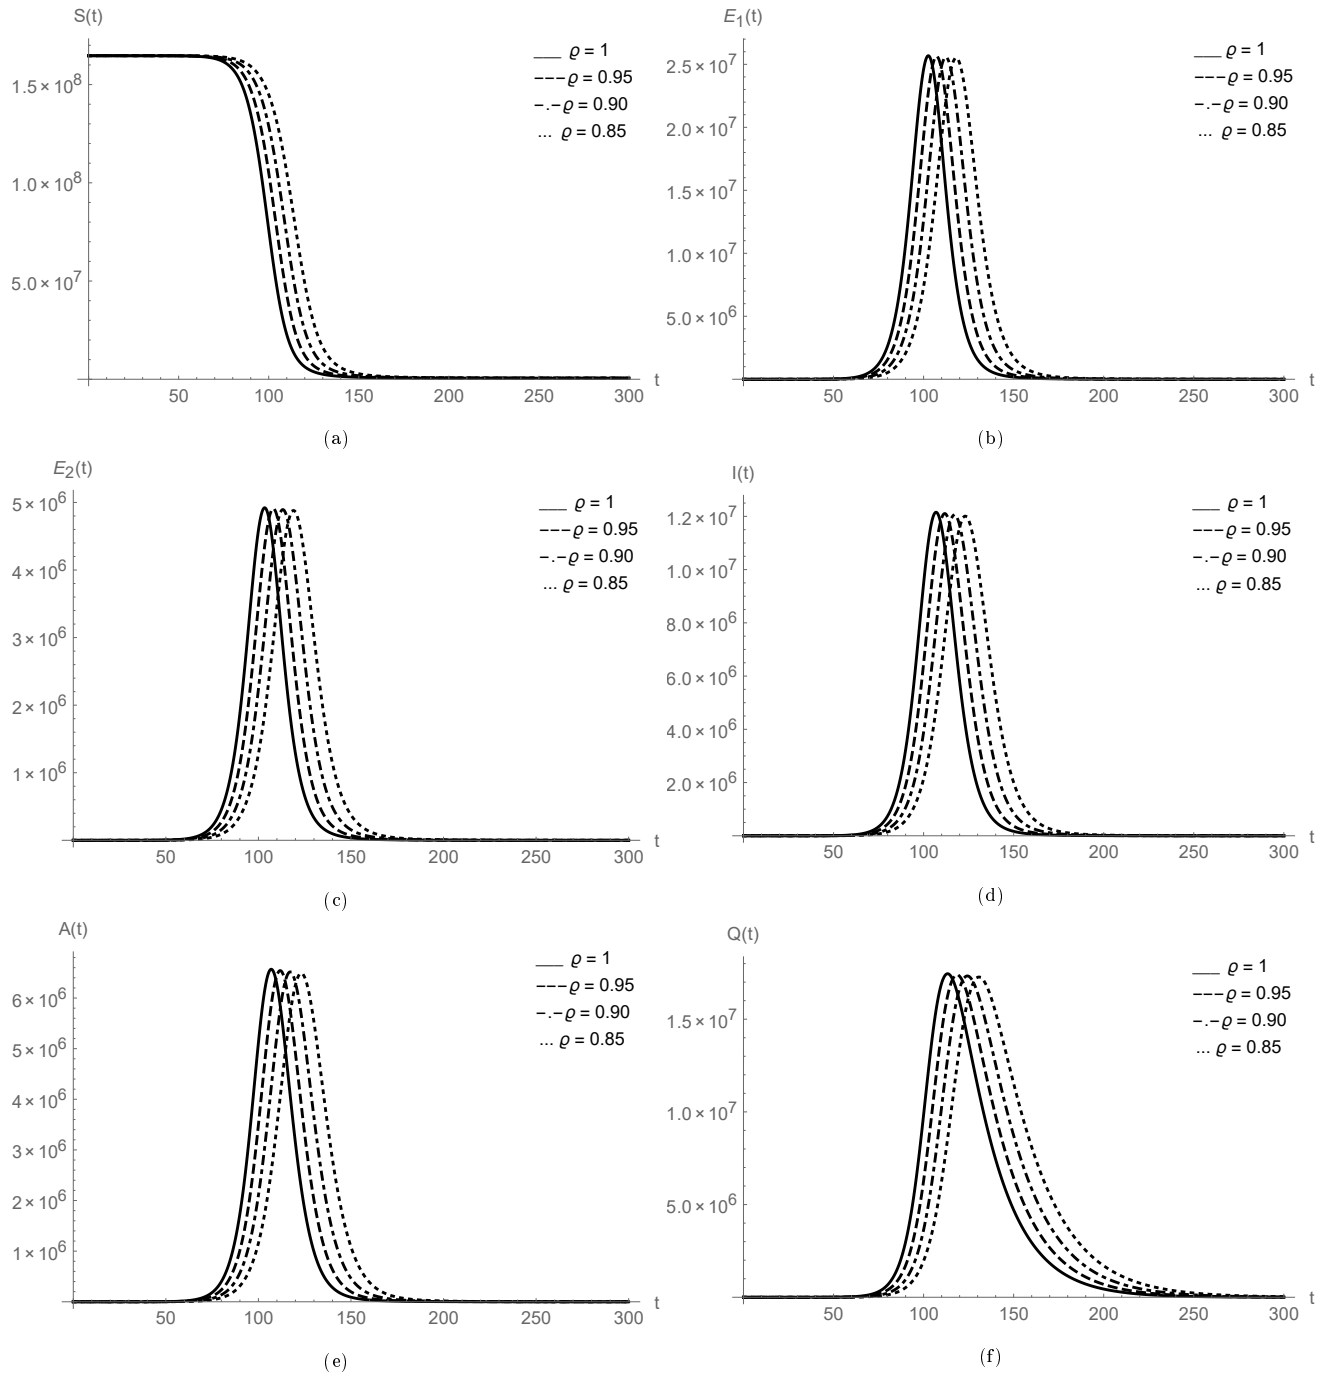

Figure 26: Plots of  $S(t)$ ,  $E_1(t)$ ,  $E_2(t)$ ,  $I(t)$ ,  $A(t)$  and  $Q(t)$  for Bangladesh data

It is made available under a [CC-BY-NC-ND 4.0 International license](https://creativecommons.org/licenses/by-nc-nd/4.0/).

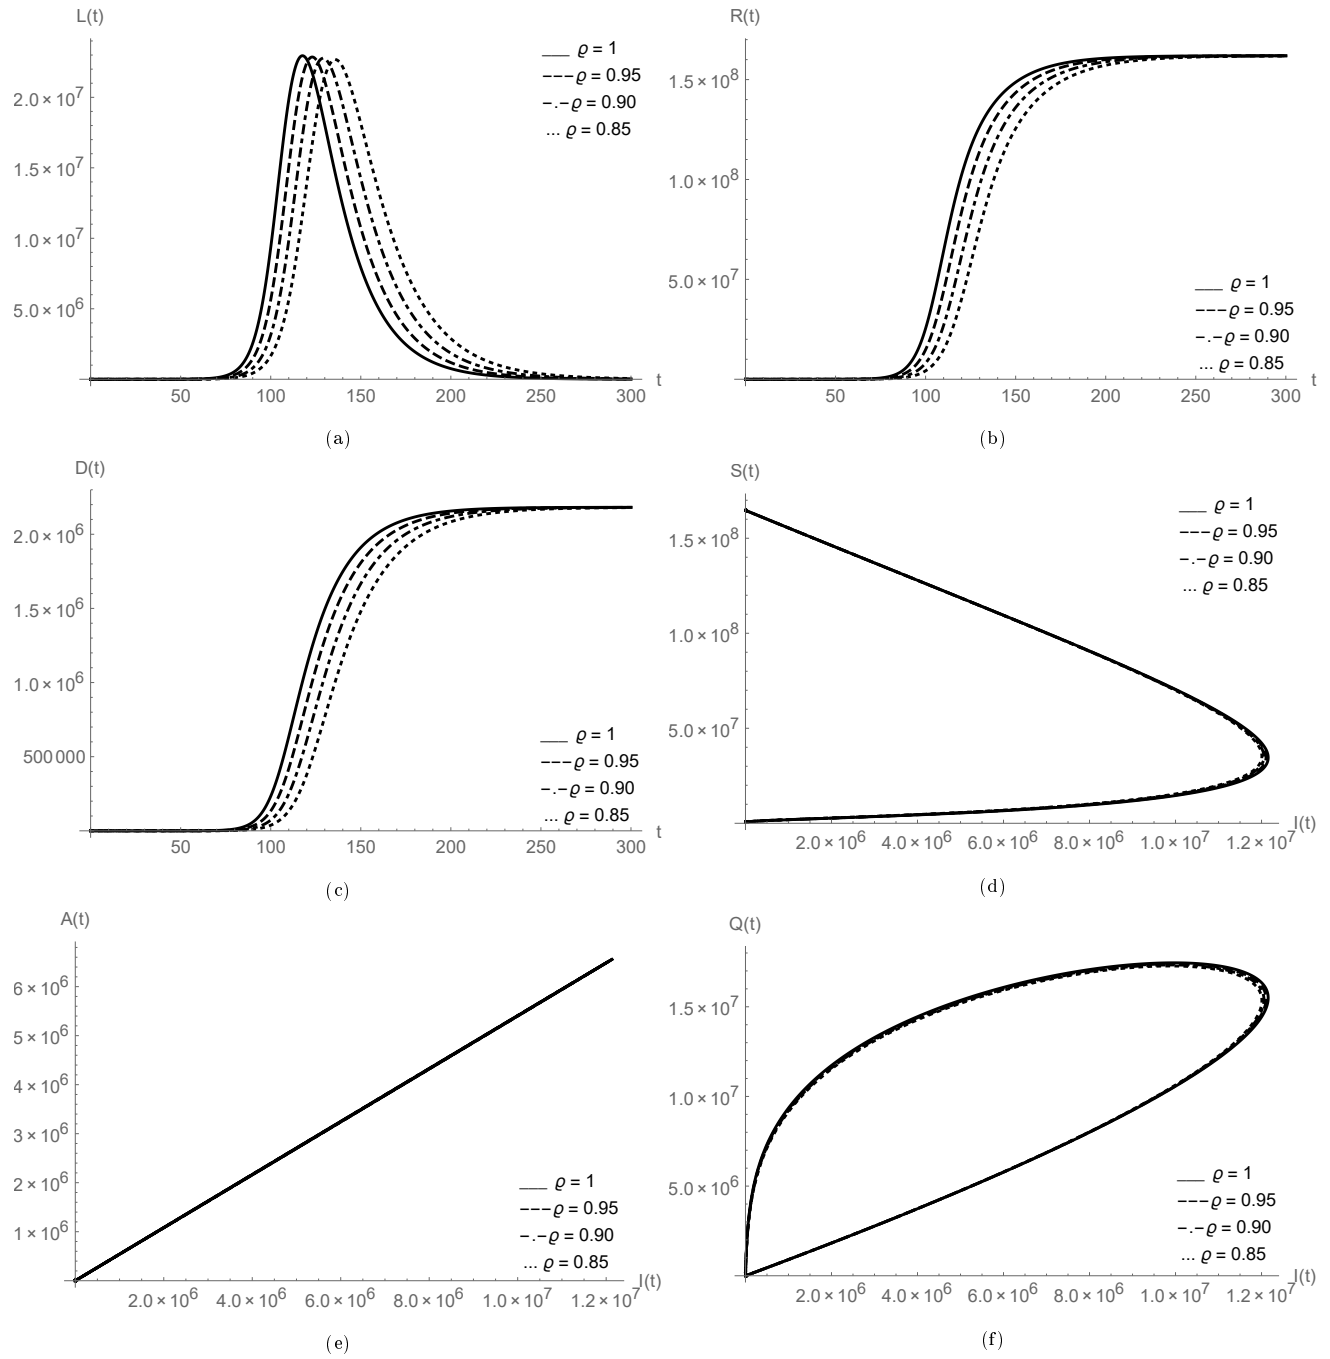

Figure 27: Plots of  $L(t)$ ,  $R(t)$ ,  $D(t)$  and relationship of  $I(t)$  versus  $S(t)$ ,  $A(t)$ ,  $Q(t)$ ,  $L(t)$ ,  $R(t)$  for Bangladesh data

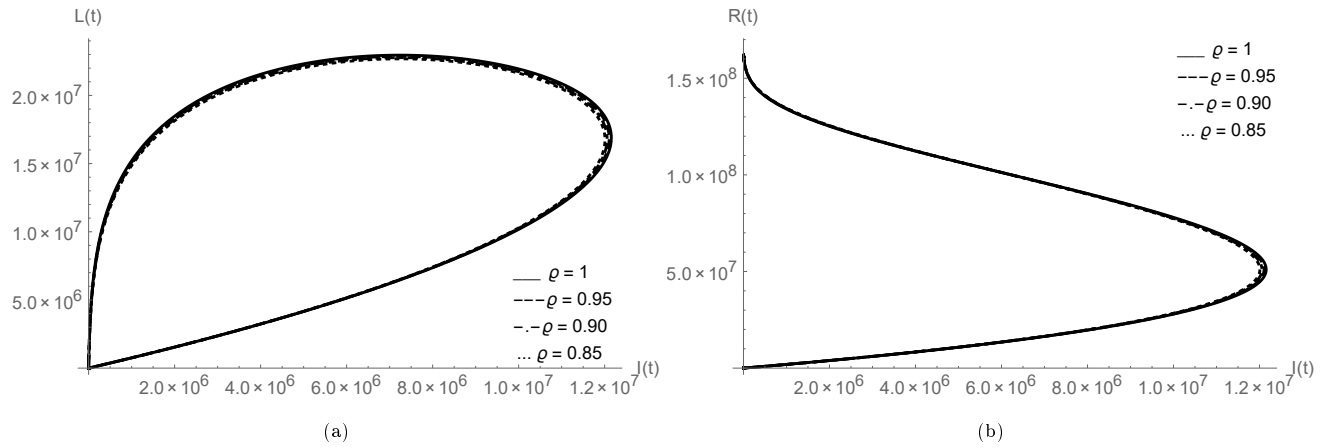

Figure 28:  $I(t)$  versus  $L(t), R(t)$  for Bangladesh data

248 In the family of Figures 29- 31, we exemplified the graphs for COVID-19 cases in Brazil. To perform  
 249 numerical simulations, we use parameter values summarize in Table 4. In the family of Figure 29, we  
 250 analysed the plots of  $S(t), E_1(t), E_2(t), I(t), A(t)$  and  $Q(t)$ . We observed that for different fractional order  
 251 values peaks are well defined and when we decrease the fractional order then the peaks sifted towards the  
 252 later time period. In the collection of Figures 30- 31, first we show the nature of  $L(t), R(t), D(t)$  and then  
 253 analysed the plots of  $I(t)$  versus  $S(t), A(t), Q(t), L(t)$  and  $R(t)$ . In the comparison of given classes with  $I(t)$ ,  
 254 we again observed that the nature of infectious  $I(t)$  is same as for above countries, as when the population  
 255 of infected individuals increases then asymptomatic infectious  $A(t)$  also increases with same nature. In  
 256 sub-figures 30d- 31b, we see that the fractional order does not play any big role because the nature of the  
 257 classes is nearly same at all different fractional order values  $\rho$ . Initial values of given classes for Brazil are  
 258  $S(0) = 212559417, E_1(0) = 10, E_2(0) = 4, I(0) = 2, A(0) = 1, Q(0) = 0, L(0) = 0, R(0) = 0$  and  $D(0) = 0$ .  
 259 We have used the total population of the country for  $S(0)$ .

It is made available under a [CC-BY-NC-ND 4.0 International license](https://creativecommons.org/licenses/by-nc-nd/4.0/).

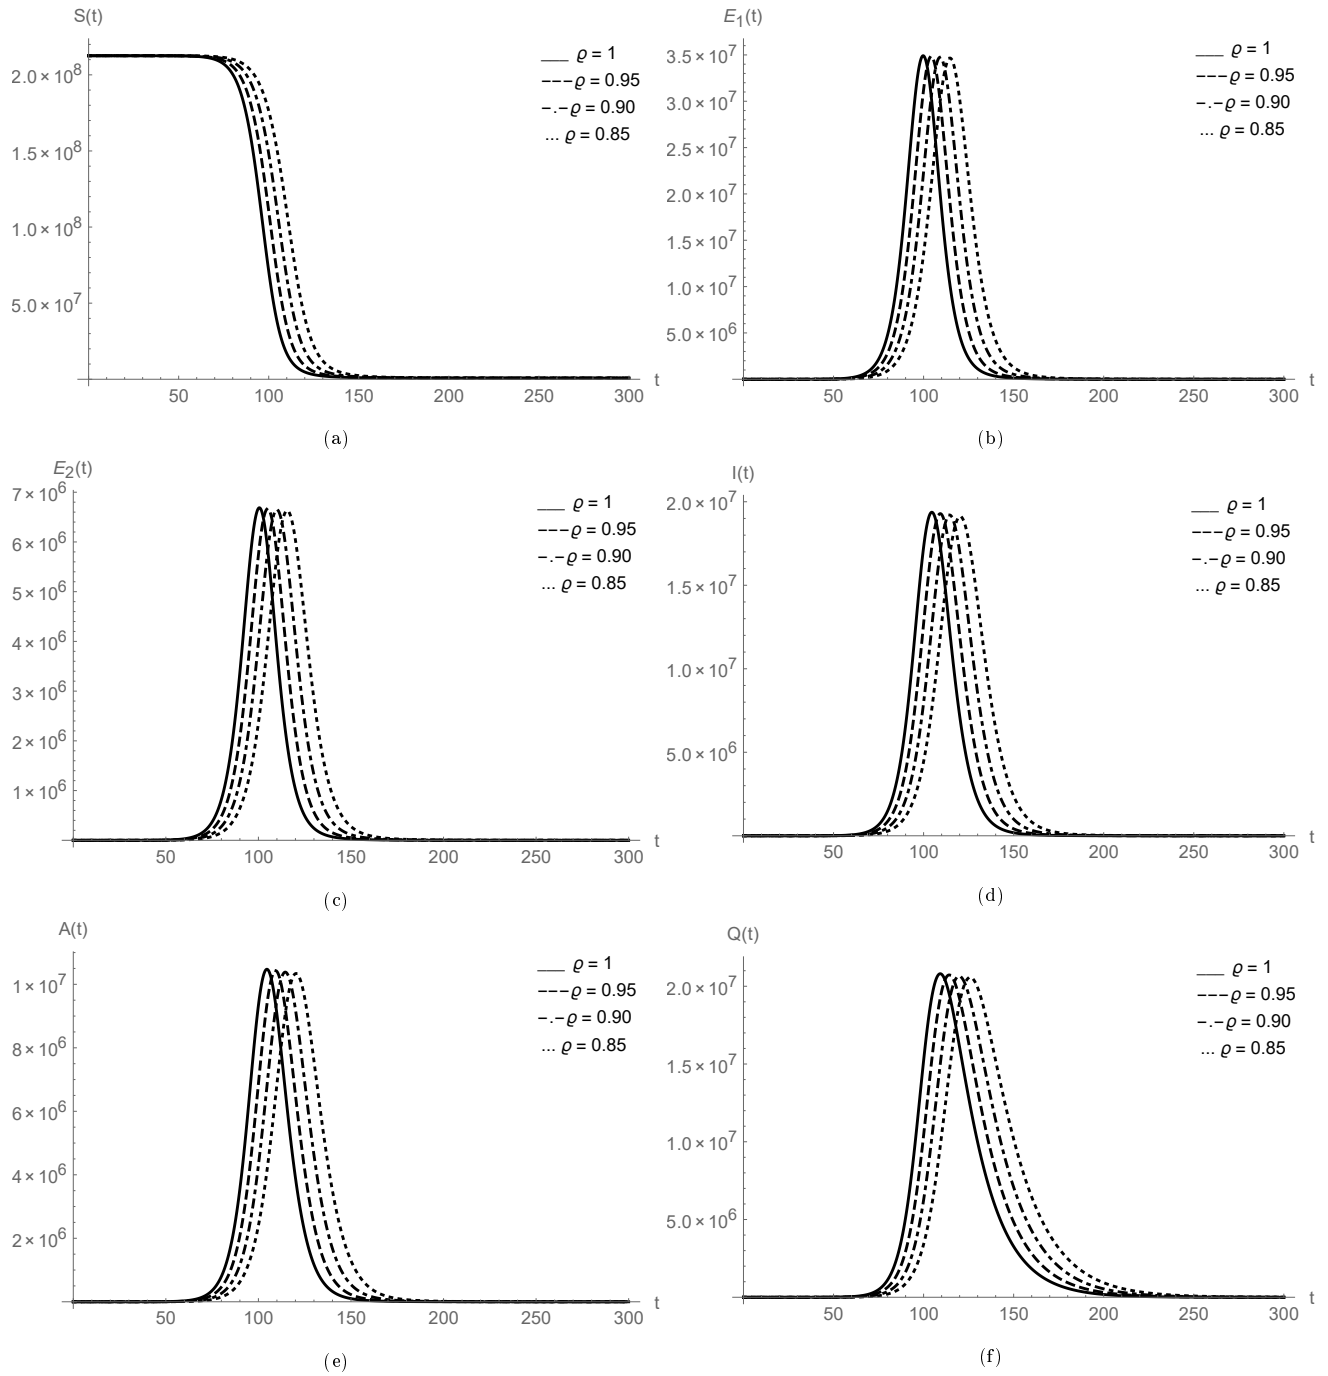

Figure 29: Plots of  $S(t)$ ,  $E_1(t)$ ,  $E_2(t)$ ,  $I(t)$ ,  $A(t)$  and  $Q(t)$  for Brazil data

It is made available under a [CC-BY-NC-ND 4.0 International license](https://creativecommons.org/licenses/by-nc-nd/4.0/).

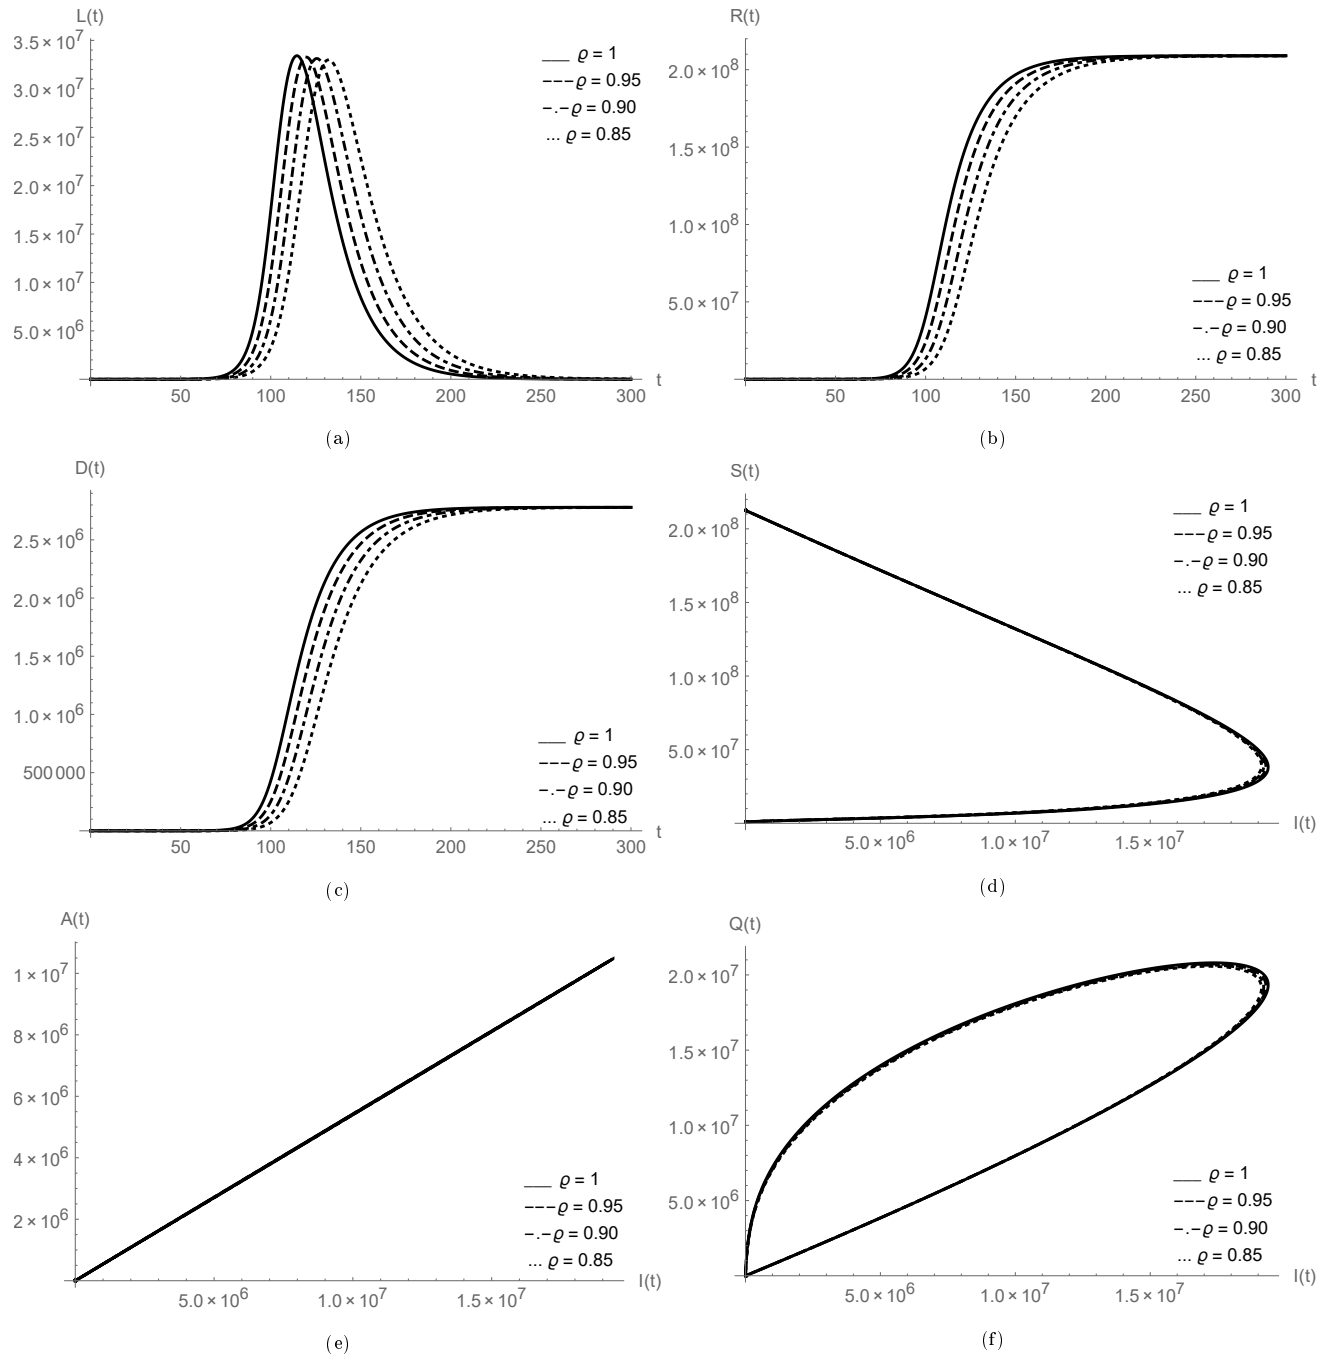

Figure 30: Plots of  $L(t)$ ,  $R(t)$ ,  $D(t)$  and relationship of  $I(t)$  versus  $S(t)$ ,  $A(t)$ ,  $Q(t)$ ,  $L(t)$ ,  $R(t)$  for Brazil data

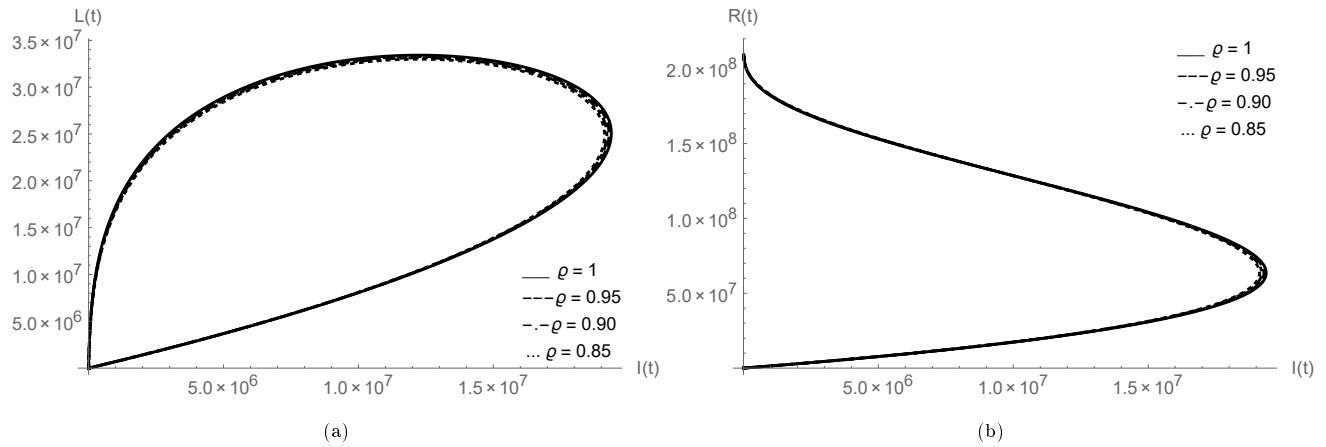

Figure 31:  $I(t)$  versus  $L(t), R(t)$  for Brazil data

260 To continue the graphical simulations for the above mentioned countries to study the outbreaks of COVID-  
 261 19, in the family of Figures 32- 34, we exemplified the graphs for COVID-19 cases in Colombia. To perform  
 262 numerical simulations, we have taken the numerical values summarize in Table 5. In the family of Figure  
 263 32, we analysed the plots of  $S(t), E_1(t), E_2(t), I(t), A(t)$  and  $Q(t)$ . We observed that the nature of peaks is  
 264 mostly same as for other above analysed data, for different fractional order values peaks are well defined and  
 265 when we decrease the fractional order then the peaks sifted towards the later time period. In the collection  
 266 of Figures 33- 34, first we show the nature of  $L(t), R(t), D(t)$  and then analysed the plots of  $I(t)$  versus  
 267  $S(t), A(t), Q(t), L(t)$  and  $R(t)$ . When we compare the given classes with  $I(t)$ , we again observed that when  
 268 the population of infected individuals increases then asymptomatic infectious  $A(t)$  also increases with same  
 269 nature. In sub-figures 33d- 34b, we see that the fractional order does not play any big role because the  
 270 nature of the classes is nearly same at all different fractional order values  $\rho$ . Initial values of given classes  
 271 for Colombia are  $S(0) = 50882891, E_1(0) = 10, E_2(0) = 4, I(0) = 2, A(0) = 1, Q(0) = 0, L(0) = 0, R(0) = 0$   
 272 and  $D(0) = 0$ . We have used the total population of the country for  $S(0)$ .



It is made available under a [CC-BY-NC-ND 4.0 International license](https://creativecommons.org/licenses/by-nc-nd/4.0/).

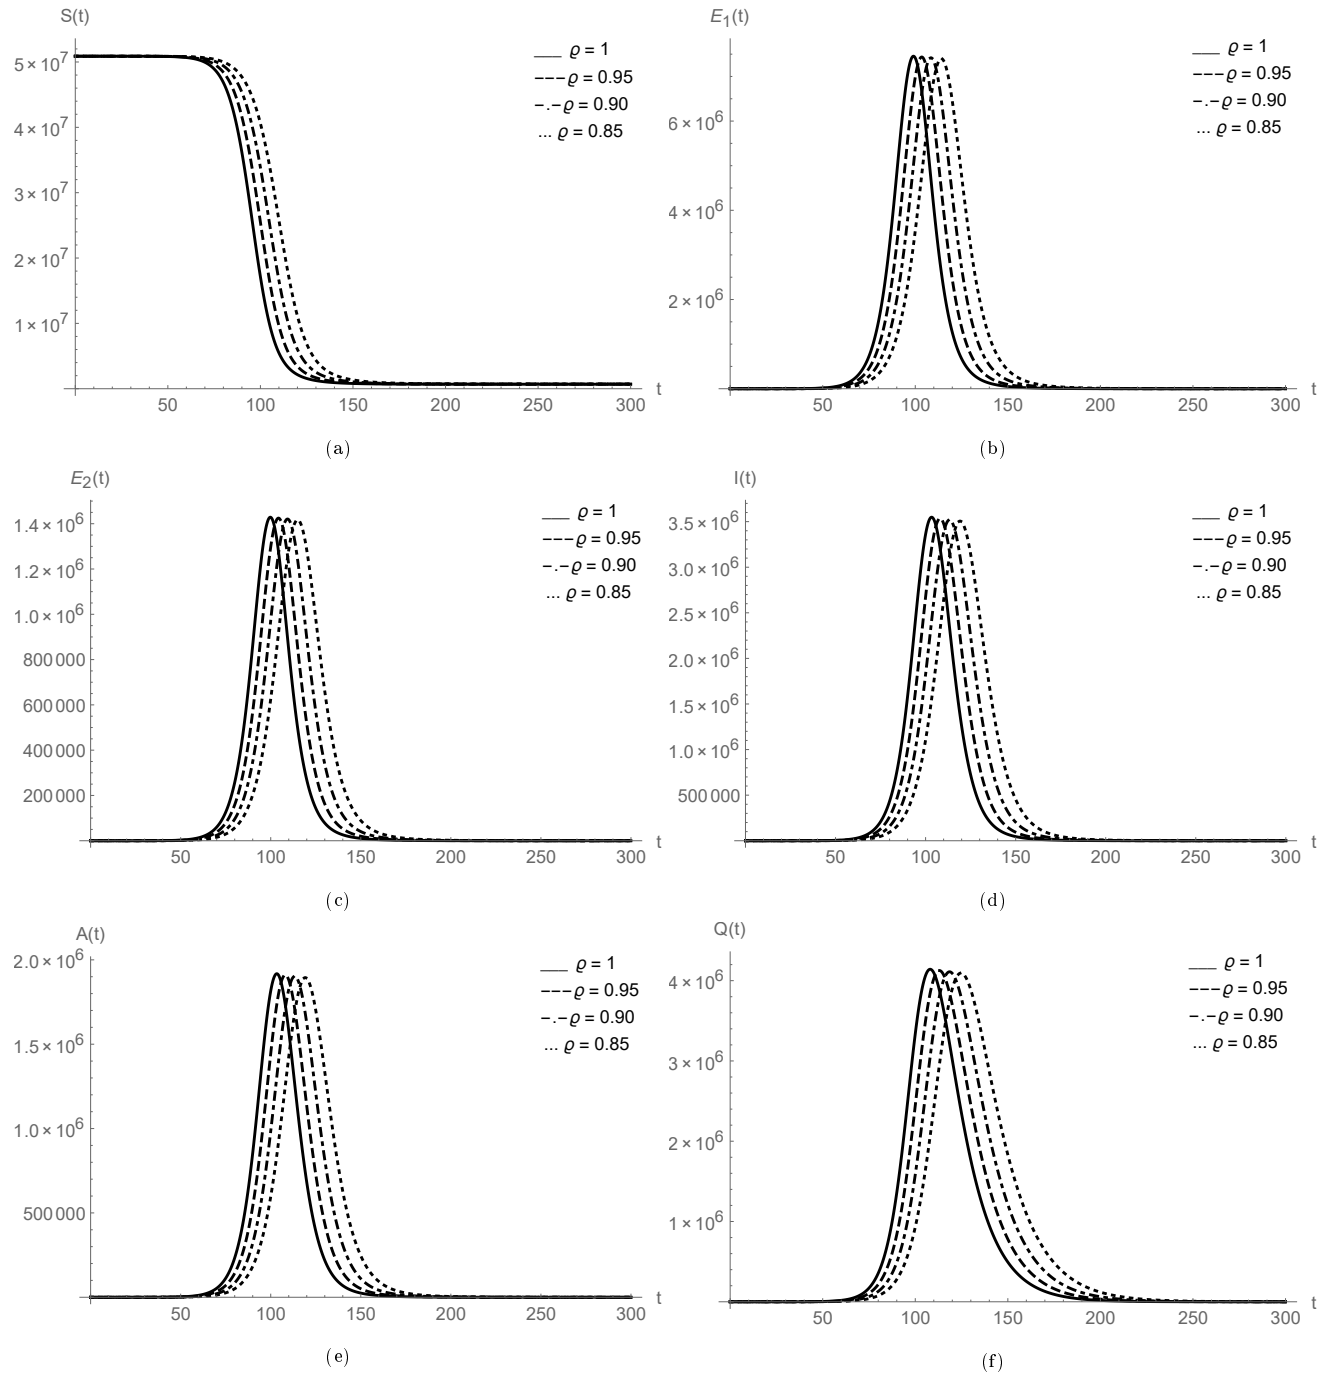

Figure 32: Plots of  $S(t)$ ,  $E_1(t)$ ,  $E_2(t)$ ,  $I(t)$ ,  $A(t)$  and  $Q(t)$  for Colombia data

It is made available under a [CC-BY-NC-ND 4.0 International license](https://creativecommons.org/licenses/by-nc-nd/4.0/).

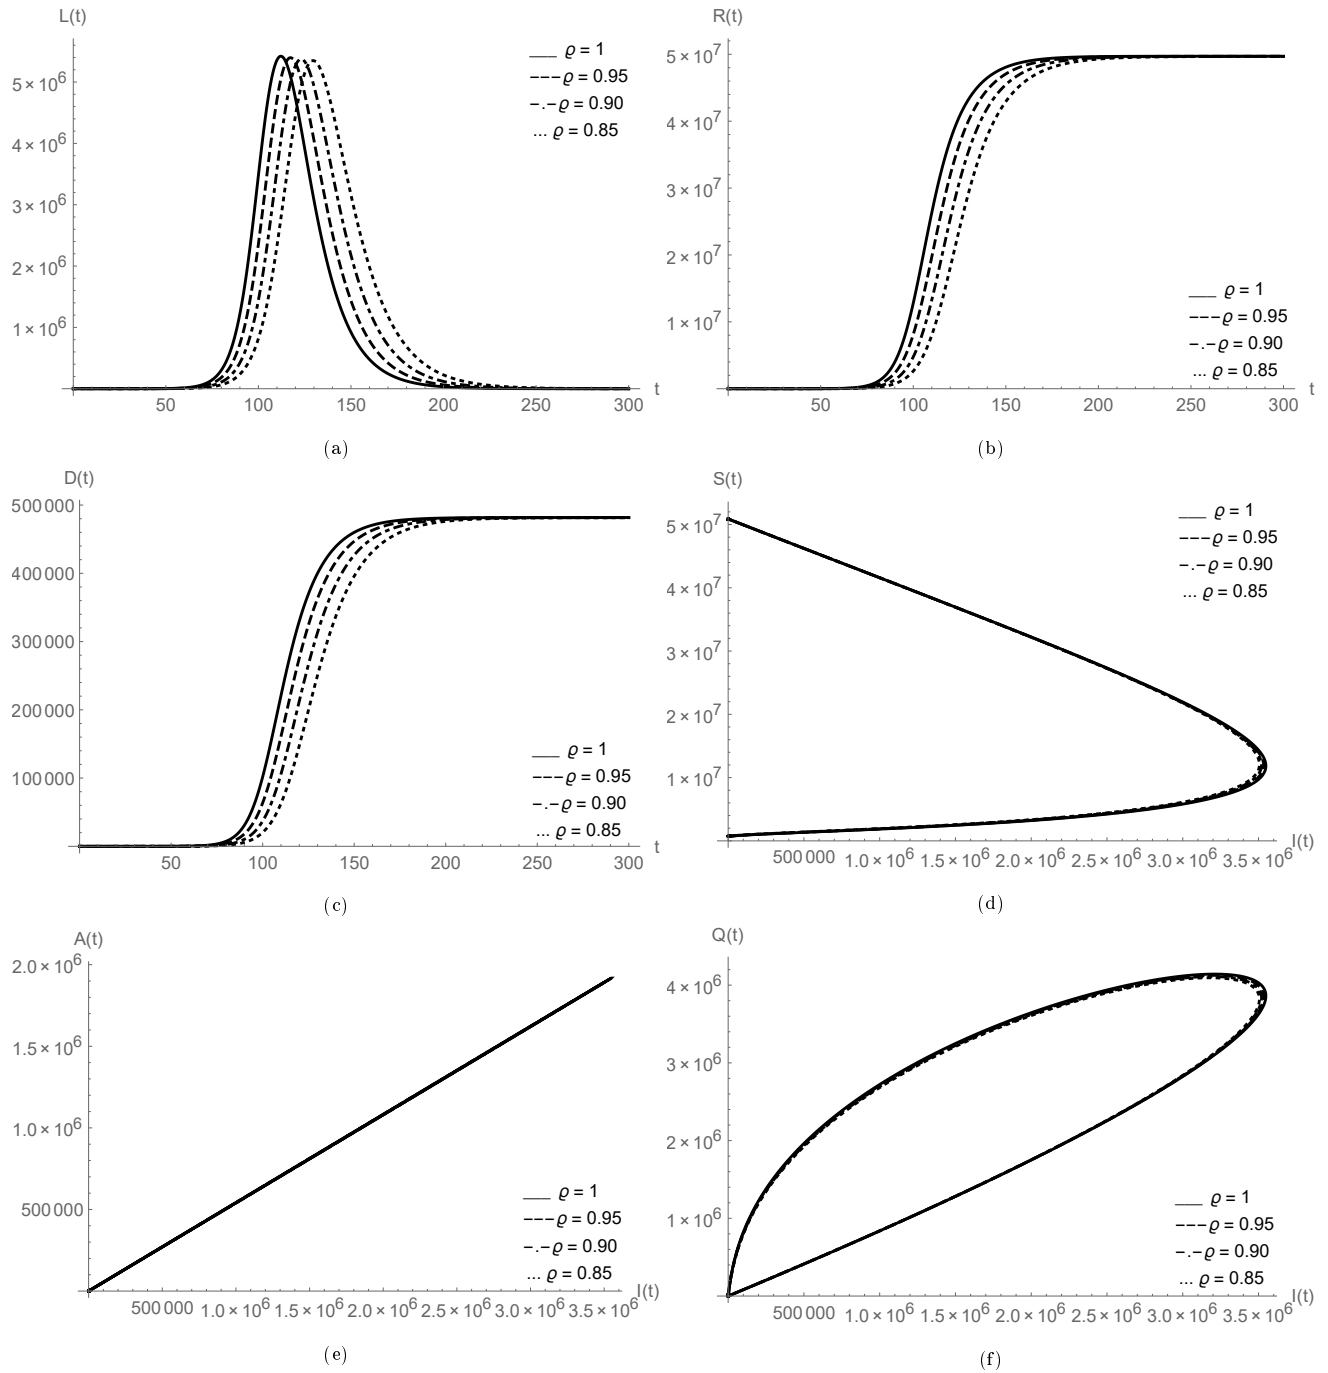

Figure 33: Plots of  $L(t)$ ,  $R(t)$ ,  $D(t)$  and relationship of  $I(t)$  versus  $S(t)$ ,  $A(t)$ ,  $Q(t)$ ,  $L(t)$ ,  $R(t)$  for Colombia data

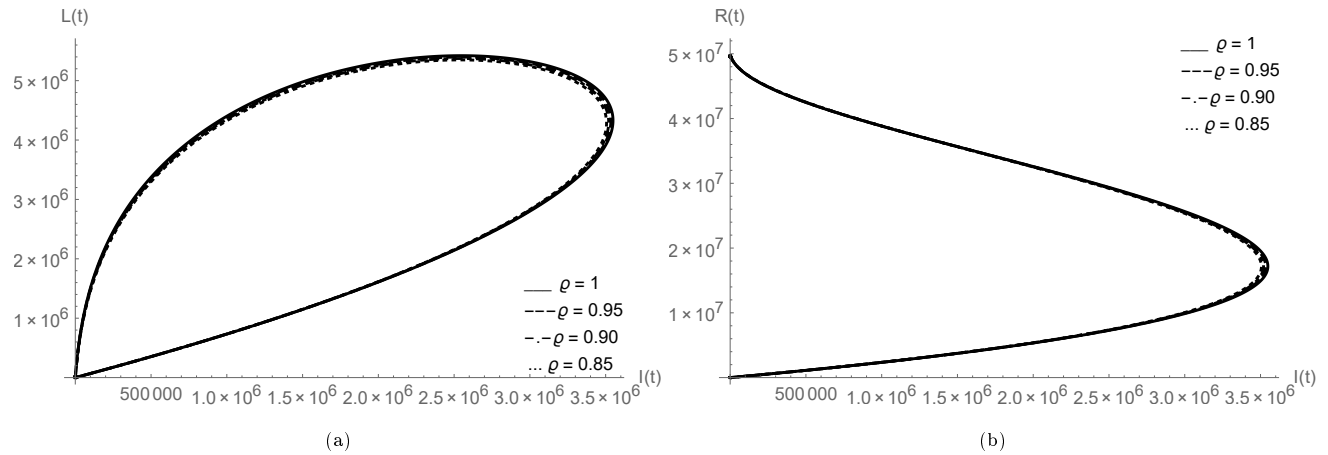

Figure 34:  $I(t)$  versus  $L(t), R(t)$  for Colombia data

273 Eventually, we have done the graphical simulations for India which is the second highest populous country  
 274 and also the second worst-hit country by COVID-19. To study the outbreak of COVID-19 in India, in the  
 275 family of Figures 35- 37, we exemplified the all necessary graphs of given classes to observe the dynamics of  
 276 COVID-19. To perform numerical simulations, we took the numerical values from the Table 6. In the family  
 277 of Figure 35, we analysed the plots of  $S(t), E_1(t), E_2(t), I(t), A(t)$  and  $Q(t)$ . We observed that the nature of  
 278 peaks is mostly same as for other above analysed data, for different fractional order values peaks are well  
 279 defined and when we decrease the fractional order then the peaks sifted towards the later time period. In  
 280 the collection of Figures 36- 37, first we show the nature of  $L(t), R(t), D(t)$  and then analysed the plots of  
 281  $I(t)$  versus  $S(t), A(t), Q(t), L(t)$  and  $R(t)$ . When we compare the given classes with  $I(t)$ , we again observed  
 282 that when the population of infected individuals increases then asymptomatic infectious  $A(t)$  also increases  
 283 with same nature. In sub-figures 36d- 37b, we observed that at the different fractional order values the  
 284 nature of the classes is nearly same. Initial values of given classes for India are  $S(0) = 414001316, E_1(0) =$   
 285  $10, E_2(0) = 4, I(0) = 2, A(0) = 1, Q(0) = 0, L(0) = 0, R(0) = 0$  and  $D(0) = 0$ . We have used the 30% of the  
 286 total population of India for  $S(0)$ .

It is made available under a [CC-BY-NC-ND 4.0 International license](https://creativecommons.org/licenses/by-nc-nd/4.0/).

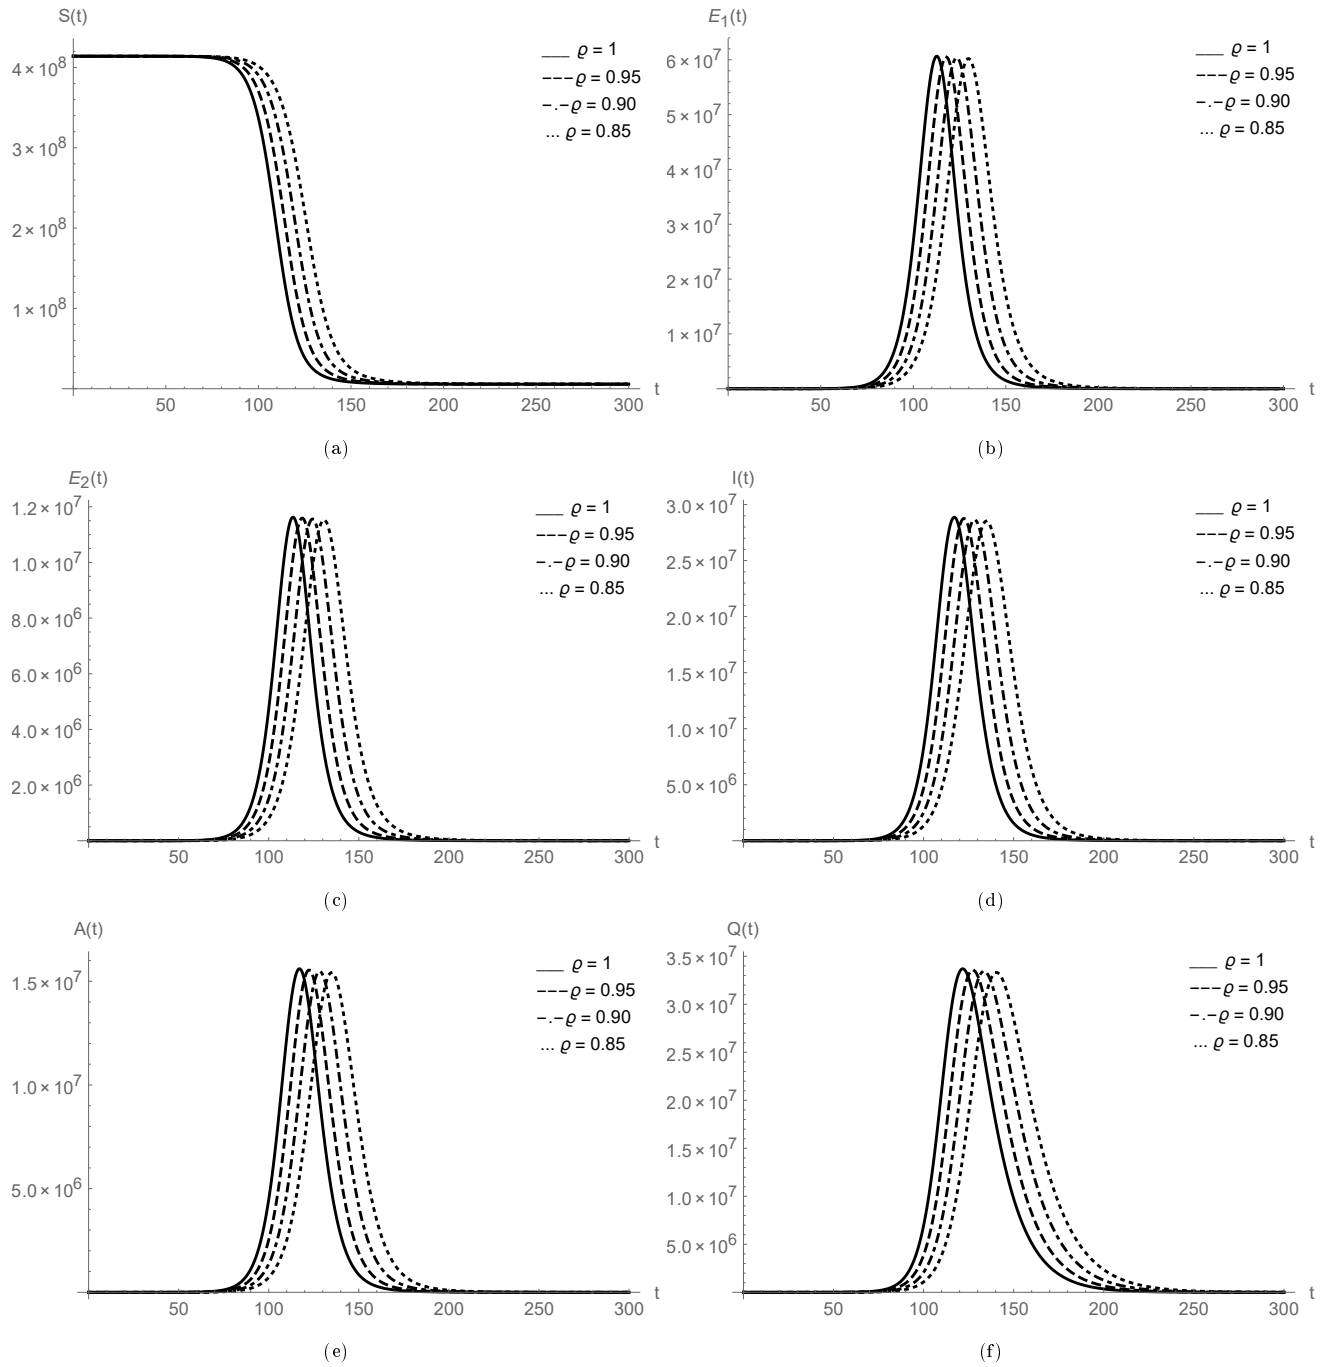

Figure 35: Plots of  $S(t)$ ,  $E_1(t)$ ,  $E_2(t)$ ,  $I(t)$ ,  $A(t)$  and  $Q(t)$  for India data

It is made available under a [CC-BY-NC-ND 4.0 International license](https://creativecommons.org/licenses/by-nc-nd/4.0/).

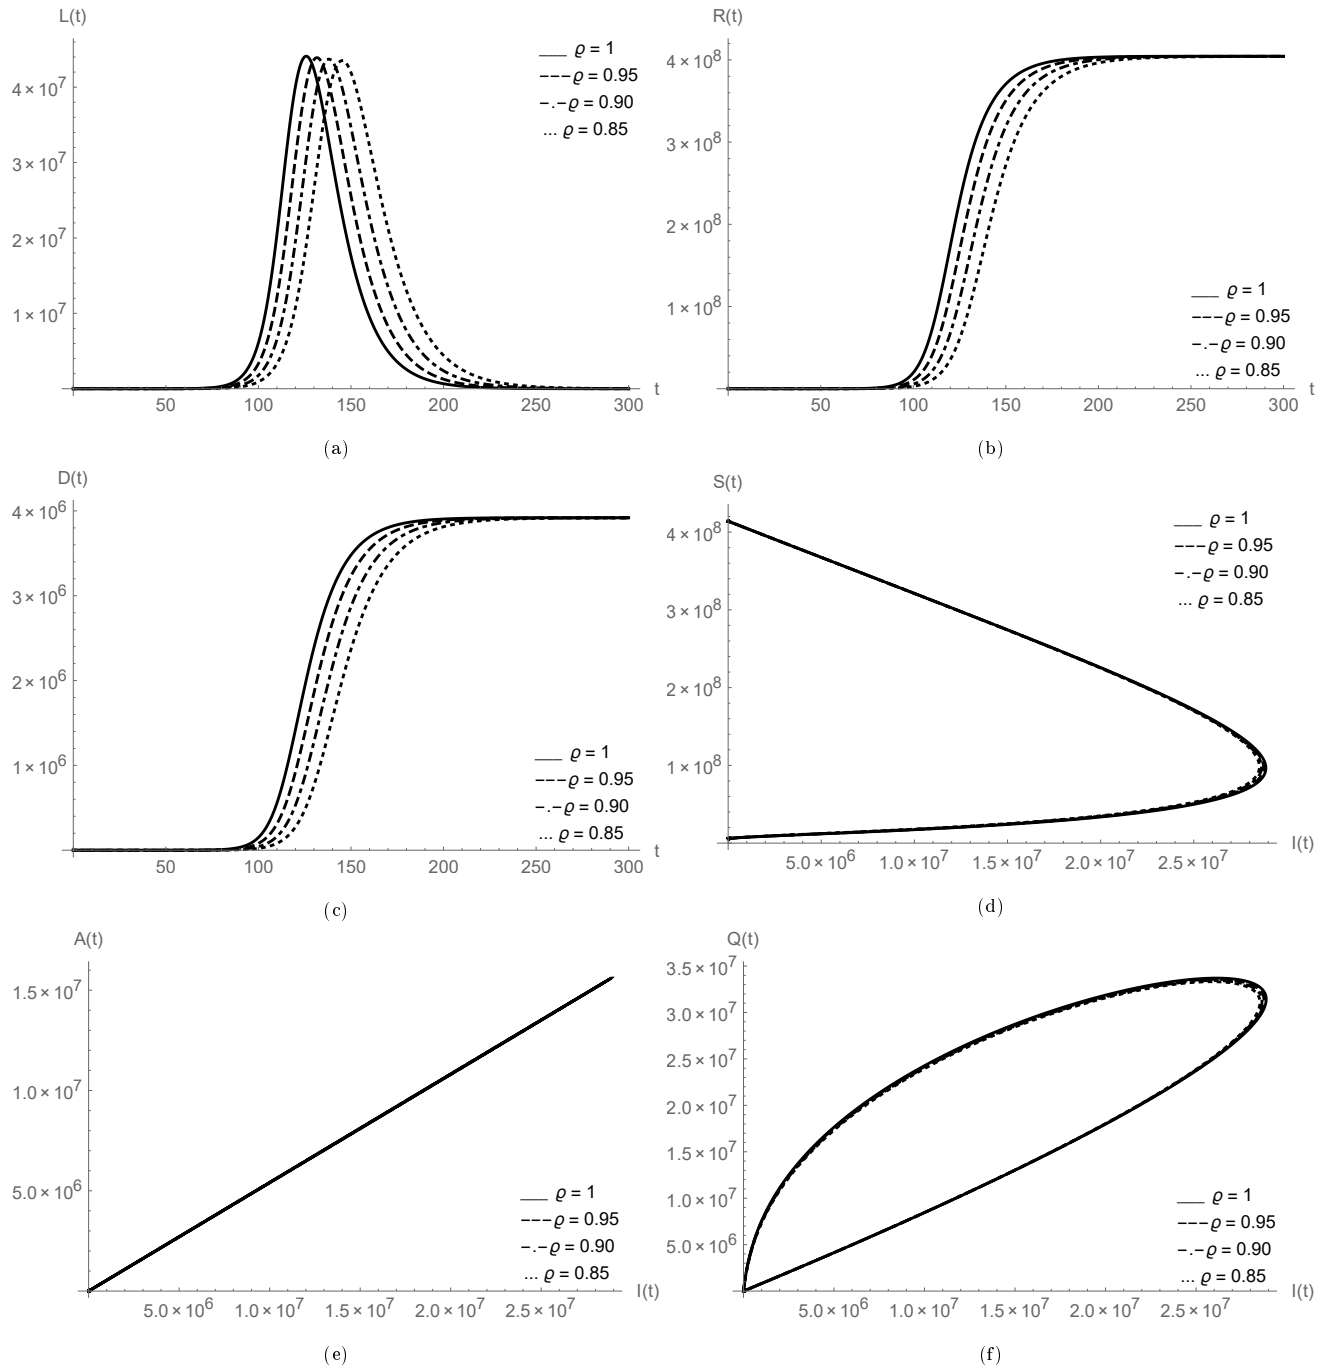

Figure 36: Plots of  $L(t)$ ,  $R(t)$ ,  $D(t)$  and relationship of  $I(t)$  versus  $S(t)$ ,  $A(t)$ ,  $Q(t)$ ,  $L(t)$ ,  $R(t)$  for India data

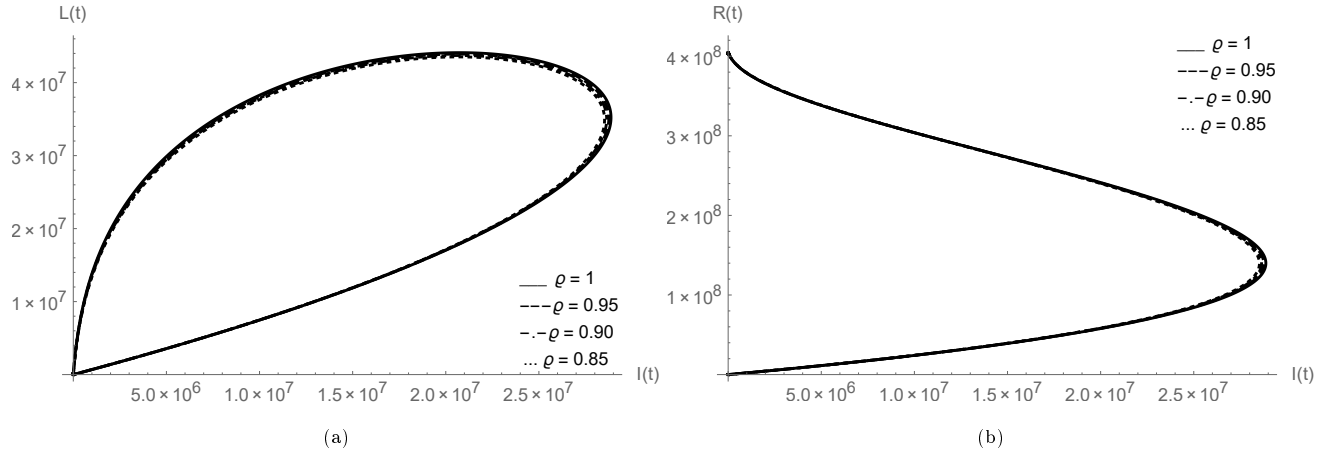

Figure 37:  $I(t)$  versus  $L(t), R(t)$  for India data

287 From the all above graphical observations we found that the Caputo-Fabrizio fractional derivative playing  
 288 well to study the outbreaks of coronavirus in the aforesaid five countries.

## 289 7. Optimal control problem formulation

In this concern, our main aim is to decrease the number of infected individuals with COVID-19 at the same time decrease the cost  $J(v)$  associated with their strategies. For this purpose, we use a control function  $v = (v_1, v_2, v_3)$ , where  $v_1(t)$  is for introducing the public education or aware the public with health-care measures,  $v_2(t)$  is the control function for enhancement of the strength of treatment for the infected individuals,  $v_3(t)$  is the control function for the necessary suggestions of health care measures for those who are in asymptomatic infectious class and yet not admitted in the hospital.

$$\left\{ \begin{array}{l} {}^{CF}D_t^\rho S(t) = -(1 - v_1)(\lambda_I + \lambda_A + \lambda_Q + \lambda_L + \lambda_{E_2})S, \\ {}^{CF}D_t^\rho E_1(t) = (1 - v_1)(\lambda_I + \lambda_A + \lambda_Q + \lambda_L + \lambda_{E_2})S - \kappa_1 E_1, \\ {}^{CF}D_t^\rho E_2(t) = \kappa_1 E_1 - (\kappa_2 + q)E_2, \\ {}^{CF}D_t^\rho I(t) = \rho \kappa_2 E_2 - (\tau_I + \gamma_I + \delta_I + v_2)I, \\ {}^{CF}D_t^\rho A(t) = (1 - \rho)\kappa_2 E_2 - (\tau_A + \gamma_A + v_3)A, \\ {}^{CF}D_t^\rho Q(t) = qE_2 - (\gamma_Q + \delta_Q)Q, \\ {}^{CF}D_t^\rho L(t) = \tau_I I + \tau_A A - (\delta_L + \gamma_L)L, \\ {}^{CF}D_t^\rho R(t) = \gamma_I I + \gamma_A A + \gamma_Q Q + \gamma_L L. \end{array} \right. \quad (26)$$

290 To define the optimal control problem (OCP), we are excluding the death equation  $D(t)$ , because there  
 291 is no significance of deaths in optimal controls. Now consider the state system given in (26) in  $R^8$ ,

292 with the set of admissible control function.  $\Omega = \{(v_1(\cdot), v_2(\cdot), v_3(\cdot)) | v_i \text{ is Lebesgue measurable on } [0, 1]$   
 293  $0 \leq (v_1(\cdot), v_2(\cdot), v_3(\cdot)) \leq 1$  So the objective functional is defined by

$$J((v_1(\cdot), v_2(\cdot), v_3(\cdot))) = \int_0^T [I(t) + \frac{1}{2}(k_1 v_1^2(t) + k_2 v_2^2(t) + k_3 v_3^2(t))] dt \quad (27)$$

294 where the constants  $k_1, k_2$  and  $k_3$  are a measure of associative cost with the controls  $v_1, v_2$  and  $v_3$ . Then  
 295 we find the optimal controls  $v_1, v_2$  and  $v_3$  to minimize the cost function.

$$J((v_1, v_2, v_3)) = \int_0^T \mu(S, E_1, E_2, I, A, Q, L, R, v_1, v_2, v_3, t) dt \quad (28)$$

296 subject to constraint,

$$297 \quad {}_0^C D_t^\rho S(t) = \phi_1, \quad {}_0^C D_t^\rho E_1(t) = \phi_2, \dots \quad {}_0^C D_t^\rho R(t) = \phi_8$$

298 where  $\phi_j = \phi(S, E_1, E_2, I, A, Q, L, R, V_1, V_2, V_3, t)$ ,  $j = 1, 2, \dots, 8$  and the given initial coordination are  
 299 agreed  $S(0) = S_0, E_1(0) = E_10, R(0) = R_0$

Now let us take the following modified cost function

$$\tilde{x} = \int_0^T [H(S_1, E_1, \dots, R, v_i, t) - \sum_{j=1}^8 (\theta_j \phi_j(S_1, E_1, \dots, R, v_i, t))] dt \quad (29)$$

300 where  $i = 1, 2, 3$  and  $j = 1, 2, 3, \dots, 8$  Hence the Hamiltonian is defined as follows:

$$H(S_1, E_1, \dots, R, v_i, t) = \mu(S_1, E_1, \dots, R, v_i, t) + \sum_{j=1}^8 (\theta_j \phi_j(S_1, E_1, \dots, R, v_i, t)) \quad (30)$$

301 where  $i = 1, 2, 3$  and  $j = 1, 2, 3, \dots, 8$  from Equation 29 and 30, the necessary and sufficient conditions for  
 302 the functional optimal control problem (FOCP) are given as:

$${}_0^C D_t^\rho \theta_1 = \frac{\partial H}{\partial S}, \quad {}_0^C D_t^\rho \theta_2 = \frac{\partial H}{\partial E_1}, \dots \quad {}_0^C D_t^\rho \theta_8 = \frac{\partial H}{\partial R} \quad (31)$$

$$0 = \frac{\partial H}{\partial v_i} \quad (32)$$

$${}_0^C D_t^\rho S(t) = \frac{\partial H}{\partial \theta_1}, \dots \quad {}_0^C D_t^\rho R(t) = \frac{\partial H}{\partial \theta_8} \quad (33)$$

303 Moreover,  $\theta_j(T) = 0$ ,  $j = 1, 2, \dots, 8$ , are the lagseuges multipliers Eqn 31 and 32 express the necessary  
 304 condition in terms of a Hamiltonian for the OCP defined above.

305 *7.1. Optimality conditions for fractional order*

306 Let us write the Hamiltonian function as follows:

307 
$$H(S_1, E_1, \dots, R, v_i, \theta) = I + \frac{1}{2}(k_1 v_1^2 + k_2 v_2^2 + k_2 v_3^2) + \theta_1[-(1 - v_1)(\lambda_I + \lambda_A + \lambda_Q + \lambda_L + \lambda_{E_2})S] + \theta_2[(1 -$$
  
 308 
$$v_1)(\lambda_I + \lambda_A + \lambda_Q + \lambda_L + \lambda_{E_2})S - \kappa_1 E_1] + \theta_3[\kappa_1 E_1 - (\kappa_2 - q)E_2] + \theta_4[\rho \kappa_2 E_2 - (\tau_I + \gamma_I + \delta_I + v_2)I] + \theta_5[(1 -$$
  
 309 
$$\rho)\kappa_2 E_2 - (\tau_A + \gamma_A + v_3)A] + \theta_6[qE_2 - (\gamma_Q + \delta_Q)Q] + \theta_7[\tau_I I + \tau_A A - (\delta_L + \gamma_L)L] + \theta_8[\gamma_I I + \gamma_A A + \gamma_Q Q + \gamma_L L]$$
  
 310 where  $\theta_j, \quad j = 1, 2, \dots, 8$ , representing the lagrangars multipliers called co-states.

311

**Theorem:** If  $v_1^*, v_2^*$  and  $v_3^*$  are optimal controls of the given OCP if  $S^*, E_1^*, \dots, R^*$  are corresponding optimal paths, then there exists co-state variables  $\theta_1^*, \dots, \theta_8^*$ , such that besides the given control system is satisfied, the following conditions are satisfied:

Co-state equations:

$$\begin{aligned} {}_c^C D^{\alpha} \theta_1^* &= (1 - v_1)(\lambda_I + \lambda_A + \lambda_Q + \lambda_L + \lambda_{E_2})\theta_1^* - (1 - v_1)(\lambda_I + \lambda_A + \lambda_Q + \lambda_L + \lambda_{E_2})\theta_2^*, \\ {}_c^C D^{\alpha} \theta_2^* &= \kappa_1 \theta_2^* - \kappa_1 \theta_3^* \\ {}_c^C D^{\alpha} \theta_3^* &= \beta_{E_2}(1 - m\zeta) \frac{S}{N} \theta_1^* - \beta_{E_2}(1 - m\zeta) \frac{S}{N} \theta_2^* + (\kappa_2 + q)\theta_3^* - \rho \kappa_2 \theta_4^* - (1 - \rho)\kappa_2 \theta_5^* - q\theta_6^* \\ {}_c^C D^{\alpha} \theta_4^* &= \beta_I(1 - m\zeta) \frac{S}{N} \theta_1^* - \beta_I(1 - m\zeta) \frac{S}{N} \theta_2^* + (I_I + Y_I + \delta_I + v_2)\theta_4^* - \tau_I \theta_7^* - \gamma_I \theta_8^* \\ {}_c^C D^{\alpha} \theta_5^* &= \beta_A(1 - m\zeta) \frac{S}{N} \theta_1^* - \beta_A(1 - m\zeta) \frac{S}{N} \theta_2^* + (\tau_A + \gamma_A + v_3)\theta_5^* - \tau_A \theta_7^* - \gamma_A \theta_8^* \\ {}_c^C D^{\alpha} \theta_6^* &= \beta_Q(1 - m\zeta) \frac{S}{N} \theta_1^* - \beta_Q(1 - m\zeta) \frac{S}{N} \theta_2^* + (\gamma_Q + \delta_Q)\theta_6^* - \gamma_Q \theta_8^* \\ {}_c^C D^{\alpha} \theta_7^* &= \beta_L(1 - m\zeta) \frac{S}{N} \theta_1^* - \beta_L(1 - m\zeta) \frac{S}{N} \theta_2^* + (\delta_L + \gamma_L)\theta_7^* - \gamma_L \theta_8^* \\ {}_c^C D^{\alpha} \theta_8^* &= 0, \end{aligned} \tag{34}$$

312 with transversality conditions  $\theta_j(T) = 0, \quad j = 1, 2, \dots, 8$  and optimality conditions given by

$$H(S^*(t), \dots, R^*(t), \theta^*(t), v_i^*(t)) = \min_{0 \leq v_i \leq 1} H(S^*(t), \dots, R^*(t), \theta^*(t), v_i^*(t))$$

$$\begin{aligned} v_1^*(t) &= \min\{1, \max(0, \frac{(\theta_2^* - \theta_1^*)(\lambda_I + \lambda_A + \lambda_Q + \lambda_L + \lambda_{E_2})S^*}{D_1})\}, \\ v_2^*(t) &= \min\{1, \max(0, \frac{\theta_4^* I^*}{D_2})\}, \\ v_3^*(t) &= \min\{1, \max(0, \frac{\theta_5^* A^*}{D_3})\}. \end{aligned} \tag{35}$$

313 **Proof:** The adjoint system (34) i.e  ${}_c^C D^{\alpha} \theta_1^*, \dots, {}_c^C D^{\alpha} \theta_8^*$  are obtained from the Hamiltonian  $H$  as

314 
$$\frac{-d\theta_1}{dt} = \frac{\partial H}{\partial S}, \quad \frac{-d\theta_2}{dt} = \frac{\partial H}{\partial E_1}, \quad \dots, \quad \frac{-d\theta_8}{dt} = \frac{\partial H}{\partial R}$$

315 with zero final time conditions or transversality conditions,

316  $\theta_1(T) = 0, \theta_2(T) = 0, \dots$  and  $\theta_8(T) = 0$  and the characteristic of the fractional optimal control given  
 317 by (35) is obtained by solving the Eqn  $\frac{\partial H}{\partial v_1} = 0, \dots, \frac{\partial H}{\partial v_3} = 0$  on the interior of the control set and using the  
 318 property of control space  $v$ .



## 319 8. Conclusions

320 Different mathematical paradigms can provide considerable insights and scientific evidences pertinent to  
321 any ongoing epidemic dynamics. Based on those valuable information, health officials and public health  
322 experts can set up potential control strategies to battle against any epidemic. From the emergence of the  
323 novel coronavirus in China, researchers and scientists are working relentlessly to develop various mathematical  
324 modeling approaches to gain a deeper understanding on the progression dynamics of COVID-19 in the world.  
325 In addition, in the absence of any safe, effective and widely available COVID-19 vaccine, different preventive  
326 measures are the most effective tool in combating against the virulent virus. On the basis of robust forecasting  
327 results of reliable epidemiological models, government officials can deploy different public health intervention  
328 strategies to control the rapid transmission of the virus. In this chapter, a compartmental mathematical has  
329 been designed to describe the transmission dynamics of the COVID-19 incorporating all possible real-life  
330 interactions and effective non-pharmaceutical interventions. Disease-free equilibrium (DFE) of the proposed  
331 model is found to be globally asymptotically stable (GAS), whenever control reproduction number ( $\mathcal{R}_c$ ) less  
332 than unity. In addition, advanced forecasting techniques have also been applied for Argentina, Bangladesh,  
333 Brazil, Colombia and India to portray the future dynamics of the pandemic in near term. It has been  
334 enlightened in our study that mass-level using of highly effective face coverings could be a crucial factor  
335 in controlling the spread of coronavirus. Moreover, strict social-distancing measures and comprehensive  
336 contact-tracing are also effective strategies in battling against this pandemic. The public health implication  
337 of these insightful findings is government officials can undertake crucial clinical and public health decisions  
338 by analyzing all mathematical results and scientific evidences. Caputo-Fabrizio non-integer order derivative  
339 has been applied to solve the proposed mathematical model in fractional sense. We proved the existence  
340 of unique solution for the proposed fractional initial value problem. We proved the unconditional stability  
341 of the given technique. An important concern of fractional optimal control problem is given to suggest the  
342 health care measures for reducing the transmissibility of COVID-19 infection in the population.

## 343 Conflict of interest

344 This work does not have any conflicts of interest.

## 345 References

- 346 [1] P. Folegatti, K. Ewer, P. Aley, B. Angus, S. e. a. Becker, Safety and immunogenicity of the chadox1 ncov-  
347 19 vaccine against sars-cov-2: a preliminary report of a phase 1/2, single-blind, randomised controlled  
348 trial, *The Lancet* 396 (10249) (2020) 447–512.

- 349 [2] N. Ferguson, D. Laydon, G. Nedjati-Gilani, N. Imai, K. Ainslie, M. Baguelin, S. Bhatia, A. Boonyasiri,  
350 Z. M. Cucunubá, G. Cuomo-Dannenburg, A. Dighe, I. Dorigatti, H. Fu, K. Gaythorpe, W. Green,  
351 A. Hamlet, W. Hinsley, L. Okell, S. van Elsland, A. Ghani, Report 9: Impact of non-pharmaceutical  
352 interventions (npis) to reduce covid19 mortality and healthcare demand (2020). doi:10.25561/77482.
- 353 [3] K. et. al., Effectiveness of isolation, testing, contact tracing, and physical distancing on reducing trans-  
354 mission of sars-cov-2 in different settings: a mathematical modelling study, *The Lancet Infectious*  
355 *Diseases* 20 (10) (2020) 1151–1160.
- 356 [4] K. N. Nabi, H. Abboubakar, P. Kumar, Forecasting of covid-19 pandemic: From integer derivatives to  
357 fractional derivatives, *Chaos, Solitons & Fractals* 141 (2020) 110283.
- 358 [5] K. N. Nabi, Forecasting covid-19 pandemic: A data-driven analysis, *Chaos, Solitons & Fractals* 139  
359 (2020) 110046.
- 360 [6] C. N. Ngonghala, E. Iboi, S. Eikenberry, M. Scotch, C. R. MacIntyre, M. H. Bonds, A. B. Gumel,  
361 Mathematical assessment of the impact of non-pharmaceutical interventions on curtailing the 2019  
362 novel coronavirus, *Mathematical Biosciences* 325 (2020) 108364.
- 363 [7] A. Babaei, H. Jafari, M. Ahmadi, A fractional order hiv/aids model based on the effect of screening of  
364 unaware infectives, *Mathematical Methods in the Applied Sciences* 42 (7) (2019) 2334–2343.
- 365 [8] A. Babaei, H. Jafari, A. Liya, Mathematical models of hiv/aids and drug addiction in prisons, *The*  
366 *European Physical Journal Plus* 135 (5) (2020) 395.
- 367 [9] K. Muhammad Altaf, A. Atangana, Dynamics of ebola disease in the framework of different fractional  
368 derivatives, *Entropy* 21 (3) (2019) 303.
- 369 [10] S. Qureshi, A. Yusuf, Modeling chickenpox disease with fractional derivatives: From caputo to atangana-  
370 baleanu, *Chaos, Solitons & Fractals* 122 (2019) 111–118.
- 371 [11] M. Rivero, J. J. Trujillo, L. Vázquez, M. P. Velasco, Fractional dynamics of populations, *Applied*  
372 *Mathematics and Computation* 218 (3) (2011) 1089–1095.
- 373 [12] S. B. Bastos, D. O. Cajueiro, Modeling and forecasting the early evolution of the covid-19 pandemic in  
374 brazil, arXiv preprint arXiv:2003.14288 (2020).
- 375 [13] S. Çakan, Dynamic analysis of a mathematical model with health care capacity for pandemic covid-19,  
376 *Chaos, Solitons & Fractals* (2020) 110033.

- 377 [14] C. Covid, C. COVID, C. COVID, S. Bialek, R. Gierke, M. Hughes, L. A. McNamara, T. Pilishvili,  
378 T. Skoff, Coronavirus disease 2019 in children—united states, february 12–april 2, 2020, Morbidity and  
379 Mortality Weekly Report 69 (14) (2020) 422.
- 380 [15] D. Cucinotta, M. Vanelli, Who declares covid-19 a pandemic., Acta bio-medica: Atenei Parmensis 91 (1)  
381 (2020) 157–160.
- 382 [16] V. S. Erturk, P. Kumar, Solution of a covid-19 model via new generalized caputo-type fractional deriva-  
383 tives, Chaos, Solitons & Fractals (2020) 110280.
- 384 [17] W. Gao, P. Veerasha, H. M. Baskonus, D. Prakasha, P. Kumar, A new study of unreported cases of  
385 2019-ncov epidemic outbreaks, Chaos, Solitons & Fractals (2020) 109929.
- 386 [18] S. Jiang, S. Xia, T. Ying, L. Lu, A novel coronavirus (2019-ncov) causing pneumonia-associated respi-  
387 ratory syndrome, Cellular & molecular immunology 17 (5) (2020) 554–554.
- 388 [19] P. Kumar, V. Suat Erturk, The analysis of a time delay fractional covid-19 model via caputo type  
389 fractional derivative, Mathematical Methods in the Applied Sciences (2020).
- 390 [20] Q. Lin, S. Zhao, D. Gao, Y. Lou, S. Yang, S. S. Musa, M. H. Wang, Y. Cai, W. Wang, L. Yang,  
391 et al., A conceptual model for the outbreak of coronavirus disease 2019 (covid-19) in wuhan, china with  
392 individual reaction and governmental action, International journal of infectious diseases (2020).
- 393 [21] N. Zhu, D. Zhang, W. Wang, X. Li, B. Yang, J. Song, X. Zhao, B. Huang, W. Shi, R. Lu, et al., A novel  
394 coronavirus from patients with pneumonia in china, 2019, New England Journal of Medicine (2020).
- 395 [22] R. L. e. a. Tillett, Genomic evidence for reinfection with sars-cov-2: a case study, The Lancet Infect.  
396 Dis. (2020).
- 397 [23] W. Walter, Ordinary Differential Equations, Springer, 1998.
- 398 [24] COVID-19 Github Repository, Center for Systems Science and Engineering at Johns Hopkins University,  
399 <https://github.com/CSSEGISandData/COVID-19> (Date accessed November 16, 2020).
- 400 [25] P. Riessche, J. Watmough, Reproduction numbers and sub-threshold endemic equilibria for compart-  
401 mental models of disease transmission, Math. Biosci. 180 (1-2) (2002) 29—48.
- 402 [26] O. Diekmann, J. A. P. Heesterbeek, J. A. J. Metz, Substantial undocumented infection facilitates the  
403 rapid dissemination of novel coronavirus (sars-cov2), J. Math. Biol. 28 (4) (1990) 365–382.
- 404 [27] R. Li, S. Pei, B. Chen, Y. Song, T. Zhang, W. Yang, J. Shaman, Substantial undocumented infection  
405 facilitates the rapid dissemination of novel coronavirus (sars-cov2), Science 368 (6490) (2020) 489–493.

- 406 [28] B. Tang, N. L. Bragazzi, Q. Li, S. Tang, Y. Xiao, J. Wu, An updated estimation of the risk of trans-  
407 mission of the novel coronavirus (2019-ncov), *Infectious Disease Modelling* 5 (2020) 248—255.
- 408 [29] F. e. a. Zhou, Clinical course and risk factors for mortality of adult inpatients with covid-19 in wuhan,  
409 china: a retrospective cohort study, *The Lancet* 395 (10229) (2020) 1054–1062.
- 410 [30] Y. Liu, A. A. Gayle, A. Wilder-Smith, J. Rocklöv, The reproductive number of covid-19 is higher  
411 compared to sars coronavirus, *Journal of travel medicine* (2020).
- 412 [31] K. N. Nabi, C. N. Podder, Sensitivity analysis of chronic hepatitis c virus infection with immune response  
413 and cell proliferation, *International Journal of Biomathematics* 13 (2020) 2050017.
- 414 [32] I. Podlubny, *Fractional differential equations: an introduction to fractional derivatives, fractional dif-*  
415 *ferential equations, to methods of their solution and some of their applications*, Elsevier, 1998.
- 416 [33] A. Jajarmi, D. Baleanu, A new fractional analysis on the interaction of hiv with cd4+ t-cells, *Chaos,*  
417 *Solitons & Fractals* 113 (2018) 221–229.
- 418 [34] J. Losada, J. J. Nieto, Properties of a new fractional derivative without singular kernel, *Progr. Fract.*  
419 *Differ. Appl* 1 (2) (2015) 87–92.
